# Supplementary material for: An in-tether sulfilimine chiral center induces helicity in short peptides
Source: Royal Society of Chemistry journal article supplement (doi:10.1039/c6cc04508a), 2016-01-01

## Electronic Supporting Information

### An in-tether sulfilimine chiral center induces helicity in short peptides

Huacan Lin,<sup>a</sup> Yixiang Jiang,<sup>a</sup> Qingzhou Zhang,<sup>a</sup> Kuan Hu<sup>a</sup> and Zigang Li<sup>\*a</sup>

<sup>a</sup> School of Chemical Biology and Biotechnology, Peking University Shenzhen  
Graduate School, Shenzhen, 518055, China.

E-mail: [lizg@pkusz.edu.cn](mailto:lizg@pkusz.edu.cn)

#### General information

For peptide synthesis, Fmoc-protected amino acids Fmoc-Ala-OH, Fmoc-Gly-OH, Fmoc-Phe-OH, Fmoc-Ile-OH, Fmoc-Val-OH, Fmoc-Leu-OH, Fmoc-Gln(Trt)-OH, Fmoc-Asn(Trt)-OH and Fmoc-D-Ala-OH were purchased from GL Biochem. 2-chlorotriylchloride resin (loading value ~0.65 mmol/g) was purchased from Nankai Synthesis. N-methylpyrrolidone (NMP), dichloromethane (DCM), dimethylformamide (DMF), diisopropylethylamine (DIPEA), trifluoroacetic acid (TFA), triisopropylsilane (TIPS) were purchased from Energy Chemical. 2,2-dimethoxy-2-phenylacetophenone (DMPA) were purchased from Aladdin Chemical. Other solvents and reagents were purchased from Energy Chemical and J&K without further purification.

The reverse phase high performance liquid chromatography (HPLC) was performed on Shimadzu prominence LC-20AT instrument equipped with C18 column and acetonitrile /water as the eluent condition. <sup>1</sup>H-NMR spectra were recorded on Bruker Avance-III 400MHz. LC-MS was recorded on Shimadzu LCMS 2020 equipped with electrospray ionization. Circular dichroism spectra were recorded on Applied photophysics chirascan instrument. In serum digestion two-month-old mice were purchased from Guangdong medical laboratory animal center.

#### Synthesis of unnatural amino acids (S<sub>3</sub>~S<sub>6</sub>)

The synthesis of S<sub>5</sub> was showed as an example, and S<sub>3</sub>, S<sub>4</sub>, S<sub>6</sub> were synthesized in the similar route.

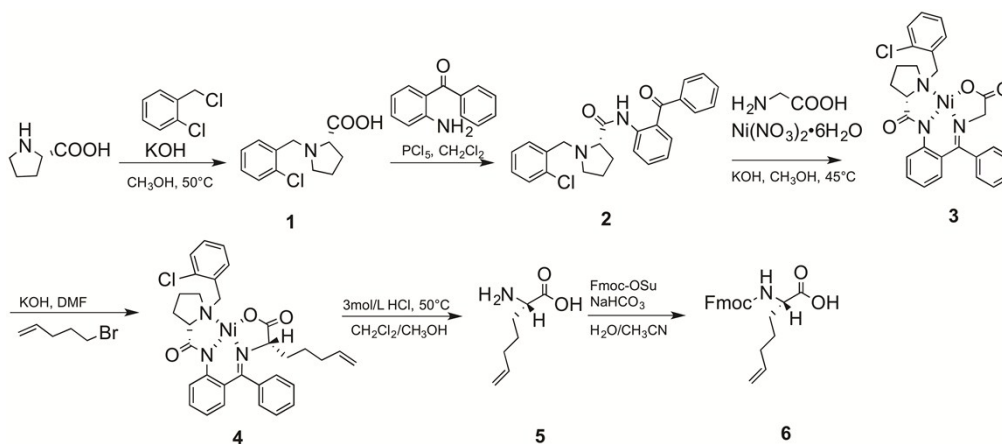

Figure S1 The synthetic route of S<sub>5</sub>

#### Compound 1:

Potassium hydroxide (76.8 g, 1.4 mol) was dissolved in anhydrous methanol (250 ml) and heated to 60°C, then L-proline (46 g, 0.4 mol) was added into the mixture. After complete dissolution, 2-chlorobenzyl chloride (65.7 ml, 0.52 mol) was added dropwise. After 24h, CH<sub>2</sub>Cl<sub>2</sub> (200 ml) was added and the reaction mixture stood for 4h. Then the mixture was filtered out and the residue was washed by CH<sub>2</sub>Cl<sub>2</sub> twice. The filtrate was gathered, concentrated and crystallized in acetone to obtain compound 1 (80.6 g, yield: 82%).

#### Compound 2:

Compound 1 (24.8 g, 0.1 mol) was added into CH<sub>2</sub>Cl<sub>2</sub> (200 ml) and the mixture was cooled to 0°C. Phosphorus pentachloride (30.2 g, 0.15 mol) was added dropwise and stirred for 1h, followed by the addition of 2-aminobenzophenone (20.0 g, 0.1 mol). The reaction was stirred at r.t. for 4h. CH<sub>2</sub>Cl<sub>2</sub> was removed under vacuum and acetone was added for crystallization to obtain compound 2 (23.5 g, yield: 56%).

#### Compound 3:

Compound 2 (25.0 g, 0.065 mol), nickel (II) nitrate hexahydrate (31.6 g, 0.11 mol) and glycine (20.5 g, 0.27 mol) were dissolved in anhydrous methanol (300 ml) and heated to 50°C. The potassium hydroxide (25.0 g, 0.47 mol) in methanol (150 ml) solution was added dropwise. After 4h, acetic acid was added. Methanol was removed and followed by the addition of water (800 ml), and stirred at r.t. overnight to promote the precipitation. The mixture was filtered out and residue was gathered to obtain red solid compound 3 (22 g, yield: 75%).

#### Compound 4

Under N<sub>2</sub> atmosphere, compound 3 (20.0 g, 0.04 mol) was dissolved in DMF (200 ml), followed by the addition of powdered potassium hydroxide (21.1 g, 0.4 mol) and the reaction mixture was stirred at r.t. for 1h. Under the condition of ice bath, 5-bromo-1-pentene (4.7 ml, 0.042 mol) was added dropwise. Then the reaction was gradually warmed to r.t. and stirred for 4h before the addition of 5% v/v acetic acid in water. The reaction continued to be stirred for 6h to promote the precipitation and filtered out. The residue was gathered and washed by water for three times to obtain compound 4 (19.7 g, yield: 87%).

#### Compound 5

Compound 4 (19.7 g, 0.035 mol) was dissolved in methanol/CH<sub>2</sub>Cl<sub>2</sub> (v/v = 50 ml/100 ml), and 3M hydrochloric acid (100 ml) was added into the mixture. The reaction was heated to 60°C and stirred overnight until yellow/green color change was observed. Then the solvent was removed in vacuo and chloroform was used for

extraction for three times to recover the ligand. The amino acid aqueous fraction was used for the next step without further purification.

#### Compound 6 (S<sub>5</sub>)

Sodium bicarbonate (16.8 g, 0.2 mol) and EDTA-Na (18.6 g, 0.05 mol) were added into the aqueous fraction to remove residual nickel. After stirring for 20 minutes, sodium bicarbonate was added again to make pH value of the mixture stay at 7-8.

Then the mixture was cooled to 0°C with ice bath. 9-fluorenylmethyl succinimidyl carbonate (11.7 g, 0.035 mol) was dissolved in 1,4-dioxane (50 ml) and added dropwise into the aqueous solution. The reaction was gradually warmed to r.t. and stirred for 12h. 1,4-dioxane was removed in vacuo and citric acid was added to make pH value of the mixture stay at 2-3. The reaction was extracted with ethyl acetate for three times. The organic layers were gathered, dried with Na<sub>2</sub>SO<sub>4</sub> and concentrated in vacuo. The final product S<sub>5</sub> was obtained after the purification of flash chromatography (CH<sub>2</sub>Cl<sub>2</sub>:H<sub>2</sub>O = 20:1) (4.9 g, yield: 38%).

<sup>1</sup>H NMR (400 MHz, CDCl<sub>3</sub>) δ 7.76 (d, *J* = 7.5 Hz, 2H), 7.59 (d, *J* = 7.4 Hz, 2H), 7.40 (t, *J* = 7.4 Hz, 2H), 7.31 (td, *J* = 7.4, 0.9 Hz, 2H), 5.75 (s, 1H), 5.57 (s, 1H), 4.98 (dd, *J* = 27.6, 13.4 Hz, 2H), 4.40 (s, 2H), 4.21 (t, *J* = 6.5 Hz, 1H), 2.34 – 2.16 (m, 1H), 2.00 (d, *J* = 35.3 Hz, 3H), 1.62 (s, 2H).

#### Preparation of cyclic pentapeptide sulfides before oxidation

The synthesis of cyclic pentapeptide sulfide Ac-(cyclo-1,5)-[S<sub>5</sub>AAAC]-NH<sub>2</sub> was showed as an example, and other peptide sulfides were synthesized in the similar route. All peptides were prepared by standard Fmoc solid-phase synthesis on 2-chlorotritylchloride resin.

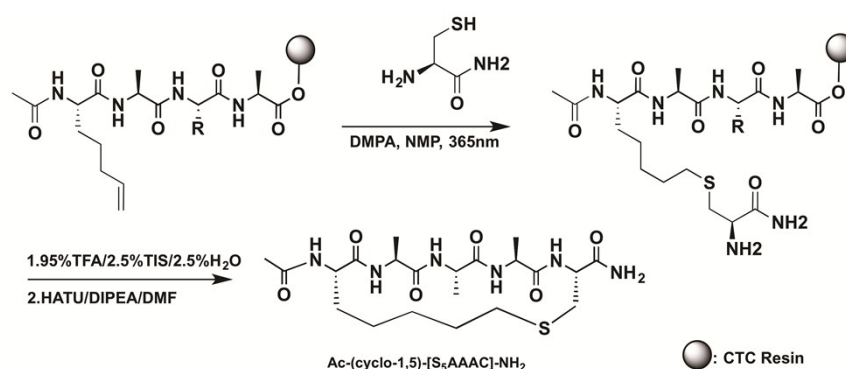

**Figure S2** The synthetic route of cyclic peptide sulfide

#### Step 1: swelling

The required resin was put into the tube and placed on the vacuum manifold. NMP (5 ml) was added and the resin was bubbled with N<sub>2</sub> for 15 minutes.

#### Step 2: coupling of the first Ala

Fmoc-Ala-OH (5 eq.) and DIPEA (10 eq.) were dissolved in NMP (5 ml) and added to the resin. The reaction mixture was bubbled with N<sub>2</sub> for 3h.

### Step 3: washing

Coupling reagents were drained, and the resin was washed by  $\text{CH}_2\text{Cl}_2$  and NMP (3  $\times$  5 ml)

### Step 4: deprotection

50% morpholine in NMP was added and the resin was bubbled with  $\text{N}_2$  (2  $\times$  30 min).

### Step 5: coupling of Fmoc-Ala-OH with HCTU

Ala (3 eq.), HCTU (2.94 eq.) and DIPEA (6 eq.) were dissolved in NMP (5 ml) and added to the resin. The reaction mixture was bubbled with  $\text{N}_2$  for 2h. Then washing, deprotection and coupling of the another Ala and  $\text{S}_5$  were followed in the similar procedure.

### Step 6: N-terminal acetylation

Acetic anhydride (1 ml) and DIPEA (3 ml) were dissolved in NMP (16 ml) and added to the resin. The reaction mixture was bubbled with  $\text{N}_2$  (2  $\times$  1 h).

### Step 7: intermolecular thiol-ene reaction

The resin was swelled in NMP (5 ml), followed by the addition of Cys (1 eq.) and DMPA (1 eq.) under  $\text{N}_2$  atmosphere. Then the flask was put under the UV lamp at 365 nm and reacted for 2h. The resulting resin was washed by  $\text{CH}_2\text{Cl}_2$  (3  $\times$  10ml).

### Step 8: macrocyclization

The crude peptide was cleaved from the resin by agitation with cleavage cocktail (TFA: TIPS:  $\text{H}_2\text{O}$ =95:2.5:2.5, v/v/v) for 2h. Then  $\text{Et}_2\text{O}$  was added for precipitation of peptides and removed after centrifugation. The precipitate peptide was dissolved in anhydrous DMF (50 ml), and the mixture was cooled to  $0^\circ\text{C}$  with ice bath. HATU (1 eq.) and DIPEA (1 eq.) were added into the mixture under  $\text{N}_2$  atmosphere. The reaction was gradually warmed to r.t. and stirred for 24h. Then DMF was removed under vacuum and the crude was dissolved in  $\text{H}_2\text{O}/\text{CH}_3\text{CN}$  for further HPLC purification.

### **Preparation of cyclic pentapeptide sulfilimines**

Cyclic pentapeptide sulfide (1 eq.) and chloramine-T (1.2 eq.) were dissolved in  $\text{CH}_3\text{CN}$  (5 ml), and the reaction was stirred at r.t. for 24h. Then  $\text{CH}_3\text{CN}$  was removed under vacuum and  $\text{H}_2\text{O}/\text{CH}_3\text{CN}$  were added to dissolve the crude for HPLC purification.

### **Circular dichroism spectroscopy**

All peptide samples were dissolved in deionized  $\text{H}_2\text{O}$  for CD measurements. CD scans were performed at wavelength from 190 nm to 250 nm with the 0.1 cm path

length for twice. Variable temperature CD scans for peptide **3B** were collected from 25°C to 70°C at 5°C intervals.

### Guanidine·HCl denaturation experiment

Cyclic pentapeptide sulfilimine **12B** (~1 mg) was added into varied concentration of guanidine·HCl (0.5 ml) 0, 0.25, 0.5, 1.0, 1.5, 2.0, 3.0, 4.0, 6.0, 7.0 M. The helicity was monitored by molar ellipticity at 215 nm.

### Serum stability

The *in vitro* serum stability assay was performed on the basis of the procedure of the following literature. Standard solution of the sulfilimine peptide **11B**, termed as Ac-(cyclo-1,5)-[S<sub>5</sub>ALAC(NTs)]-NH<sub>2</sub> and its linear analog, termed as Ac-S<sub>5</sub>ALAC(SH)-NH<sub>2</sub>, were prepared in water. Each peptide was added to the murine serum (800  $\mu$ L) and incubated at 37°C at a final concentration of 100  $\mu$ M (25% serum). Aliquots (5  $\mu$ L) were taken periodically at 0 to 18 h, and then 100  $\mu$ L 12% trichloroacetic acid in H<sub>2</sub>O/CH<sub>3</sub>CN (1:3) was added and cooled to 4 °C for 30 min to precipitate serum proteins. Samples were then centrifuged at 14000 rpm for 10 min. The standard supernatant was analyzed by LC/MS with a grace smart C18 250 $\times$  4.6mm column, using a 3% per minute linear gradient from 20% to 80% acetonitrile over 20min. The amount of starting material left in each sample was quantified by LC/MS-based peak detection at 220 nm.

### Reference

N. E. Shepherd, H. N. Hoang, G. Abbenante, D. P. Fairlie, *J. Am. Chem. Soc.*, 2005, **127**, 2974.

### Condition screening for synthesis of peptide sulfilimines

#### Preparation of model substrate **1**, **2** and **3**

Substrates **1**, **2** and **3** were synthesized for screening the optimal condition of sulfilimine synthesis. Synthetic routes of **1**, **2** and **3** were shown below.

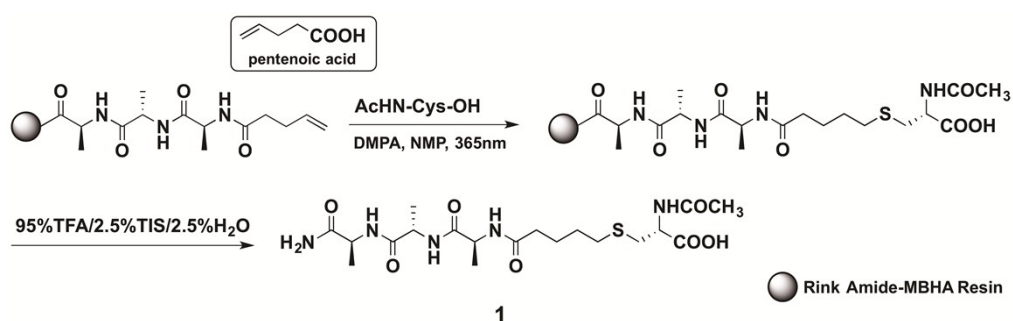

**Figure S3** The synthetic route of substrate **1**

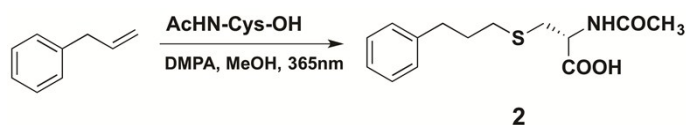

**Figure S4** The synthetic route of substrate **2**

Propenylbenzene (0.89 g, 7.5 mmol), Cys (1.23 g, 7.5 mmol) and DMPA (1.94 g, 7.5 mmol) were added into the flask purged of air, followed by the addition of methanol (20 ml). Under N<sub>2</sub> atmosphere, the reaction was stirred by UV irradiation at 365 nm for 3h. Then methanol was removed under vacuum, and the crude was purified by flash chromatography (CH<sub>2</sub>Cl<sub>2</sub>: methanol = 100:1) to obtain substrate **2** (1.73 g, yield: 81%).

<sup>1</sup>H NMR (400 MHz, DMSO) δ 8.23 (d, *J* = 8.0 Hz, 1H), 7.30 – 7.24 (m, 2H), 7.20 – 7.15 (m, 3H), 4.35 (td, *J* = 8.1, 5.1 Hz, 1H), 2.87 (dd, *J* = 13.6, 5.1 Hz, 1H), 2.72 (dd, *J* = 13.6, 8.3 Hz, 1H), 2.67 – 2.20 (m, 4H), 1.84 (s, 3H), 1.78 (dd, *J* = 14.8, 7.4 Hz, 2H).

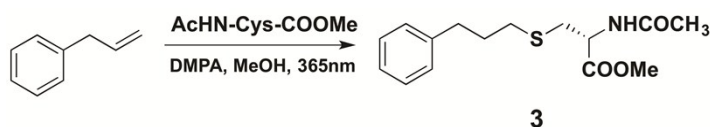

**Figure S5** The synthetic route of substrate **3**

The preparation procedure of substrate **3** was similar with **2**.

<sup>1</sup>H NMR (400 MHz, CDCl<sub>3</sub>) δ 7.31 – 7.27 (m, 2H), 7.24 – 7.14 (m, 3H), 6.27 (d, *J* = 7.1 Hz, 1H), 4.82 (dt, *J* = 7.6, 4.9 Hz, 1H), 3.74 (s, 3H), 3.05 – 2.94 (m, 2H), 2.70 (t, *J* = 7.5 Hz, 2H), 2.52 (dd, *J* = 15.2, 8.0 Hz, 2H), 2.02 (s, 3H), 1.95 – 1.83 (m, 2H).

Condition screening for sulfilimine synthesis with PhI=NTs as the nitrogen source

We utilized **1**, **2**, and **3** as substrate models to investigate the optimal condition of sulfilimine synthesis. The first method was based on the nitrogen source PhI=NTs. The results were summarized in table S1. Different metal catalysts were tested, but no corresponding peptide sulfilimines were observed.

(Abbreviation: Ts, *p*-tolylsulfonyl group ; Ns, *p*-nitrobenzolsulfonyl group)

**Table S1** Reactions of substrate **1** with PhI=NTs<sup>a</sup>

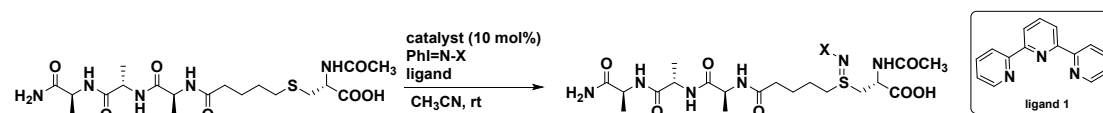

| entry | catalyst             | ligand | X  | yield (%) <sup>b</sup> |
|-------|----------------------|--------|----|------------------------|
| 1     | Fe(OTf) <sub>2</sub> | --     | Ts | NR                     |

|                |                                    |    |    |    |
|----------------|------------------------------------|----|----|----|
| 2 <sup>c</sup> | AgNO <sub>3</sub>                  | 1  | Ts | NR |
| 3              | CuOTf                              | -- | Ts | NR |
| 4 <sup>d</sup> | CuOTf                              | -- | Ts | NR |
| 5              | Fe(acac) <sub>3</sub>              | -- | Ts | NR |
| 6              | Fe(OTf) <sub>2</sub>               | -- | Ns | NR |
| 7 <sup>e</sup> | Rh <sub>2</sub> (OAc) <sub>4</sub> | -- | Ts | NR |

<sup>a</sup> Reaction conditions: peptide substrate (1.0 equiv), PhI=N-X (1.2 equiv) in CH<sub>3</sub>CN at r.t., 24 h.

<sup>b</sup> Yield after HPLC purification. <sup>c</sup> Ligand 1(8 mol%) was used. <sup>d</sup> 4Å MS was used.

<sup>e</sup> CH<sub>2</sub>Cl<sub>2</sub> was used as a solvent.

Then we tested the reactivity of substrate **2** and **3** with PhI=NTs under different conditions. The results were summarized in table S2. However, the conversions were not satisfactory. It was worth mentioning that the carboxyl group was harmful to produce sulfilimines as entry 8 showed.

**Table S2** Reactions of substrate **2**, **3** with PhI=NTs<sup>a</sup>

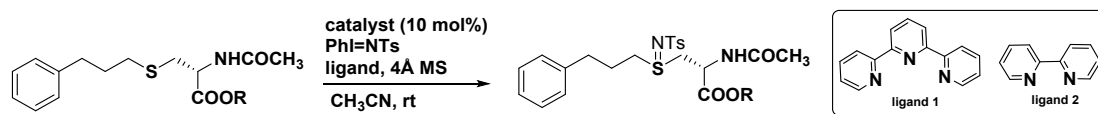

| entry          | R  | catalyst | ligand | yield (%) <sup>b</sup> |
|----------------|----|----------|--------|------------------------|
| 1              | H  | CuOTf    | --     | 10                     |
| 2              | H  | CuOTf    | 1      | 11                     |
| 3              | H  | CuOTf    | 2      | 12                     |
| 4 <sup>c</sup> | H  | CuOTf    | --     | 11                     |
| 5              | H  | AgOTf    | --     | 17                     |
| 6              | H  | AgOTf    | 1      | 19                     |
| 7              | H  | AgOTf    | 2      | 10                     |
| 8              | Me | CuOTf    | --     | 30                     |

<sup>a</sup> Reaction conditions: sulfide (1.0 equiv), PhI=NTs (1.2 equiv) in CH<sub>3</sub>CN at r.t., 24 h.

<sup>b</sup> Yield after column chromatography. <sup>c</sup> Reaction was performed at 50°C.

Condition screening for sulfilimine synthesis with chloramine-T as the nitrogen

source

Then we turned to the second method based on chloramine-T nitrogen source. Substrate **2** and **3** were utilized to react with chloramine-T, and results were summarized in table S3. We found chloramine-T was the more suitable reagent to convert sulfides to sulfilimines.

**Table S3** Reactions of substrate **2**, **3** with chloramine-T<sup>a</sup>

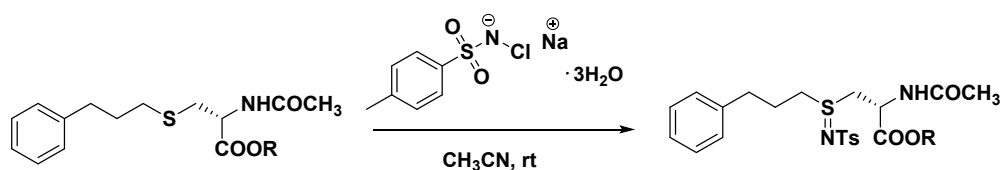

| entry          | R  | chloramine-T (equiv) | yield (%) <sup>b</sup> |
|----------------|----|----------------------|------------------------|
| 1              | H  | 1.2                  | 37                     |
| 2              | H  | 3.0                  | 30                     |
| 3 <sup>c</sup> | H  | 3.0                  | 35                     |
| 4              | Me | 1.2                  | 75                     |

<sup>a</sup> Reaction conditions: sulfide (1.0 equiv), chloramine-T (1.2 equiv) in CH<sub>3</sub>CN at r.t., 24 h.

<sup>b</sup> Yield after column chromatography. <sup>c</sup> Reaction was performed at 50°C.

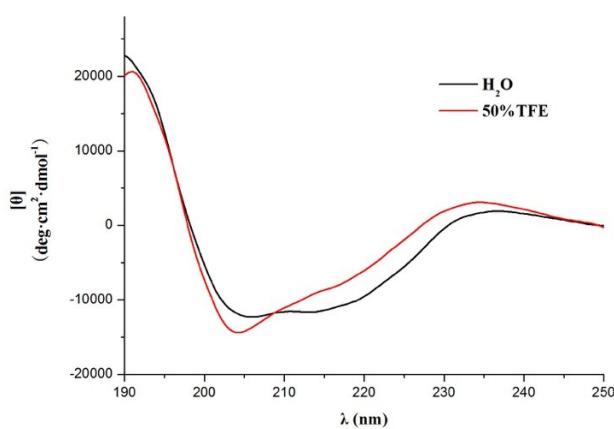

**Figure S6** CD spectra of peptide sulfilimine **3B** in H<sub>2</sub>O and 50% TFE.



**Table S4** Reactions of peptide sulfides with chloramine-T to generate **1~14**<sup>a</sup>

| peptide                                                                    | conversion (%) <sup>b</sup> |
|----------------------------------------------------------------------------|-----------------------------|
| Ac-(cyclo-1,5)-[S <sub>3</sub> AAAC(NTs)]-NH <sub>2</sub> ( <b>1</b> )     | 69                          |
| Ac-(cyclo-1,5)-[S <sub>4</sub> AAAC(NTs)]-NH <sub>2</sub> ( <b>2</b> )     | 53                          |
| Ac-(cyclo-1,5)-[S <sub>5</sub> AAAC(NTs)]-NH <sub>2</sub> ( <b>3</b> )     | 60                          |
| Ac-(cyclo-1,5)-[S <sub>6</sub> AAAC(NTs)]-NH <sub>2</sub> ( <b>4</b> )     | 56                          |
| Ac-(cyclo-1,5)-[C(NTs)AAAS <sub>5</sub> ]-NH <sub>2</sub> ( <b>5</b> )     | 81                          |
| Ac-(cyclo-1,5)-[homoC(NTs)AAAS <sub>4</sub> ]-NH <sub>2</sub> ( <b>6</b> ) | 85                          |
| Ac-(cyclo-1,5)-[S <sub>4</sub> AAAhomoC(NTs)]-NH <sub>2</sub> ( <b>7</b> ) | 65                          |
| Ac-(cyclo-1,5)-[S <sub>5</sub> AGAC(NTs)]-NH <sub>2</sub> ( <b>8</b> )     | 83                          |
| Ac-(cyclo-1,5)-[S <sub>5</sub> AFAC(NTs)]-NH <sub>2</sub> ( <b>9</b> )     | 53                          |
| Ac-(cyclo-1,5)-[S <sub>5</sub> AIAC(NTs)]-NH <sub>2</sub> ( <b>10</b> )    | 46 <sup>c</sup>             |
| Ac-(cyclo-1,5)-[S <sub>5</sub> ALAC(NTs)]-NH <sub>2</sub> ( <b>11</b> )    | 90                          |
| Ac-(cyclo-1,5)-[S <sub>5</sub> AVAC(NTs)]-NH <sub>2</sub> ( <b>12</b> )    | 57 <sup>c</sup>             |
| Ac-(cyclo-1,5)-[S <sub>5</sub> AQAC(NTs)]-NH <sub>2</sub> ( <b>13</b> )    | 59                          |
| Ac-(cyclo-1,5)-[S <sub>5</sub> ANAC(NTs)]-NH <sub>2</sub> ( <b>14</b> )    | 53                          |

<sup>a</sup> Reaction conditions: peptide sulfide (1.0 equiv), chloramine-T (1.2 equiv) in CH<sub>3</sub>CN at r.t., 24 h.

<sup>b</sup> Yield after HPLC purification and identified by 1,3,5-tribromobenzene as internal standard.

<sup>c</sup> Yield after isolation.

**Table S5** Amide coupling constants <sup>3</sup>J<sub>NH-CH $\alpha$</sub>  and temperature coefficients ( $\Delta\delta/T$ ) of peptide **12B** at 288K, 293K, 298K, 303K, 308K and 313K.

| peptide    | <sup>3</sup> J <sub>NH-CH<math>\alpha</math></sub> (Hz) |     |     |     |     | $\Delta\delta/T$ (ppb/K) |      |      |      |      |
|------------|---------------------------------------------------------|-----|-----|-----|-----|--------------------------|------|------|------|------|
|            | S <sub>5</sub>                                          | Ala | Val | Ala | Cys | S <sub>5</sub>           | Ala  | Val  | Ala  | Cys  |
| <b>12B</b> | 1.9                                                     | 3.7 | 6.5 | 3.9 | 7.0 | -6.3                     | -4.3 | -9.5 | -4.7 | -3.5 |

**Table S6** Amide NH chemical shift of peptide **12B** at 288K, 293K, 298K, 303K, 308K and 313K.

| K   | S <sub>5</sub> | Ala   | Val   | Ala   | Cys   |
|-----|----------------|-------|-------|-------|-------|
|     | HN             | HN    | HN    | HN    | HN    |
| 288 | 8.383          | 8.543 | 7.663 | 8.243 | 8.003 |
| 293 | 8.342          | 8.522 | 7.612 | 8.212 | 7.982 |

|      |       |       |       |       |       |
|------|-------|-------|-------|-------|-------|
| 298  | 8.315 | 8.505 | 7.565 | 8.185 | 7.965 |
| 303  | 8.292 | 8.482 | 7.512 | 8.172 | 7.942 |
| 308  | 8.258 | 8.458 | 7.468 | 8.148 | 7.938 |
| 313  | 8.225 | 8.435 | 7.425 | 8.125 | 7.915 |
| Jahn | 1.9Hz | 3.7Hz | 6.5Hz | 3.9Hz | 7.0Hz |

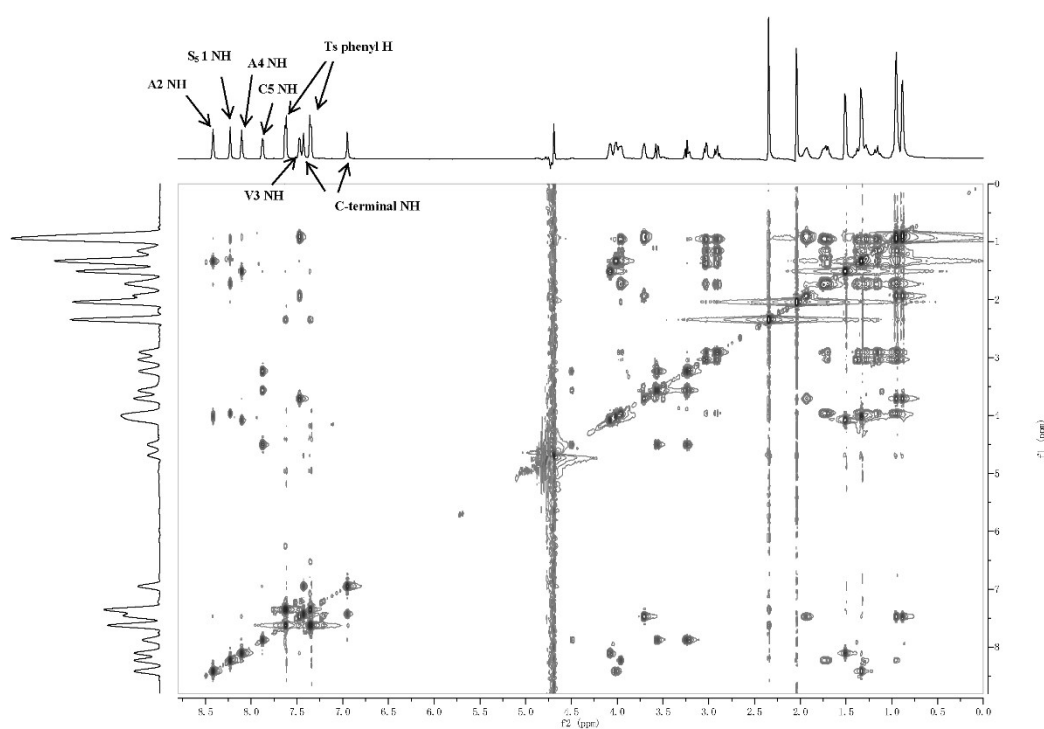

**Figure S7** The ROESY spectrum for peptide **12B** ( $\text{H}_2\text{O}:\text{D}_2\text{O}=9:1$ , 288K, 600 MHz). The amide protons were indicated and labelled by one letter amino acid codes and their sequential numbers from N-terminal to C-terminal in **12B**.

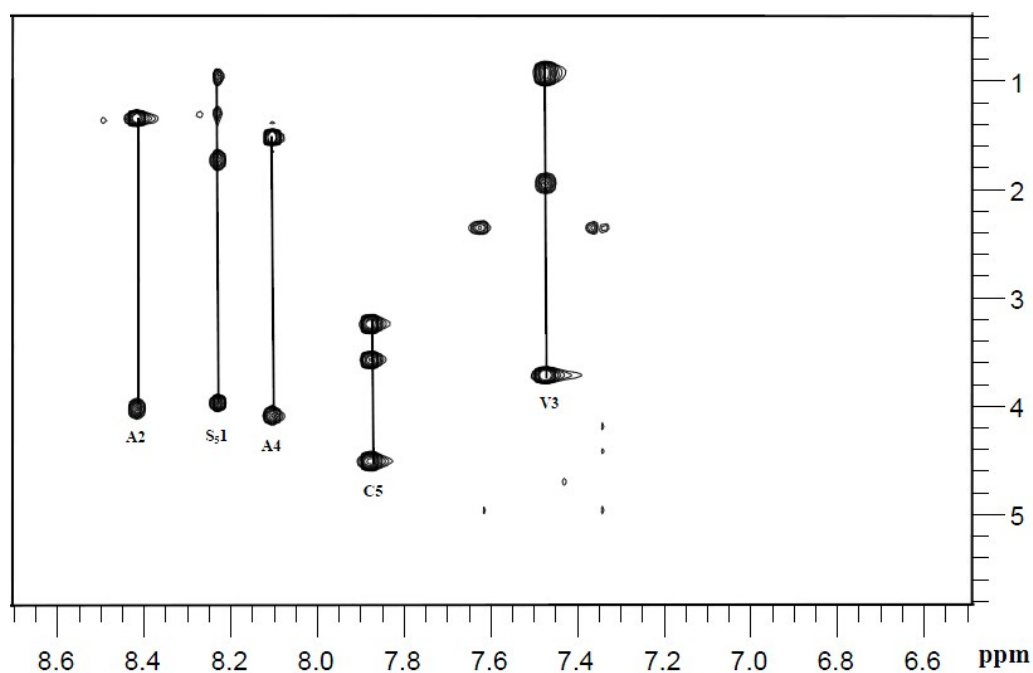

**Figure S8** Section from the TOCSY spectrum for peptide **12B** ( $\text{H}_2\text{O}:\text{D}_2\text{O}=9:1$ , 288K, 600 MHz). Spin systems were indicated and labelled by one letter amino acid codes and their sequential numbers from N-terminal to C-terminal in **12B**.

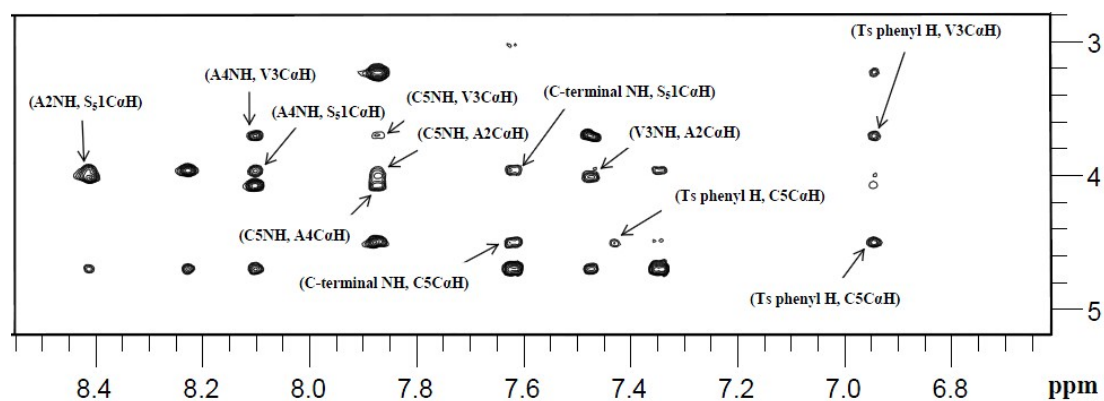

**Figure S9** Section from the ROESY spectrum for peptide **12B** ( $\text{H}_2\text{O}:\text{D}_2\text{O}=9:1$ , 288K, 600 MHz). Residue amide NH-C $\alpha$ H connectivity was indicated and labelled by one letter amino acid codes and their sequential numbers from N-terminal to C-terminal in **12B**.

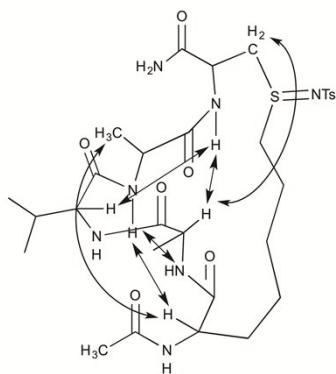

**Figure S10** Region of 600-MHz NOESY spectrum of peptide **12B** in H<sub>2</sub>O solution

**Table S7** MS data for peptides **1~14**.

| peptide    | [M+H] <sup>+</sup> (m/z) |          |
|------------|--------------------------|----------|
|            | calculated               | observed |
| <b>1A</b>  | 642.2                    | 642.3    |
| <b>1B</b>  | 642.2                    | 642.3    |
| <b>2A</b>  | 656.2                    | 656.3    |
| <b>2B</b>  | 656.2                    | 656.3    |
| <b>3A</b>  | 670.3                    | 670.4    |
| <b>3B</b>  | 670.3                    | 670.4    |
| <b>4A</b>  | 684.3                    | 684.4    |
| <b>4B</b>  | 684.3                    | 684.4    |
| <b>5A</b>  | 670.3                    | 670.4    |
| <b>5B</b>  | 670.3                    | 670.4    |
| <b>6A</b>  | 670.3                    | 670.4    |
| <b>6B</b>  | 670.3                    | 670.4    |
| <b>7A</b>  | 670.3                    | 670.4    |
| <b>7B</b>  | 670.3                    | 670.4    |
| <b>8A</b>  | 656.3                    | 656.3    |
| <b>8B</b>  | 656.3                    | 656.3    |
| <b>9A</b>  | 746.3                    | 746.4    |
| <b>9B</b>  | 746.3                    | 746.4    |
| <b>10A</b> | 712.3                    | 712.4    |
| <b>10B</b> | 712.3                    | 712.4    |
| <b>11A</b> | 712.3                    | 712.4    |
| <b>11B</b> | 712.3                    | 712.5    |
| <b>12A</b> | 698.3                    | 698.4    |
| <b>12B</b> | 698.3                    | 698.3    |
| <b>13A</b> | 727.3                    | 727.4    |
| <b>13B</b> | 727.3                    | 727.4    |
| <b>14A</b> | 713.3                    | 713.4    |
| <b>14B</b> | 713.3                    | 713.3    |

## HPLC analyses of formation of peptides 1~15

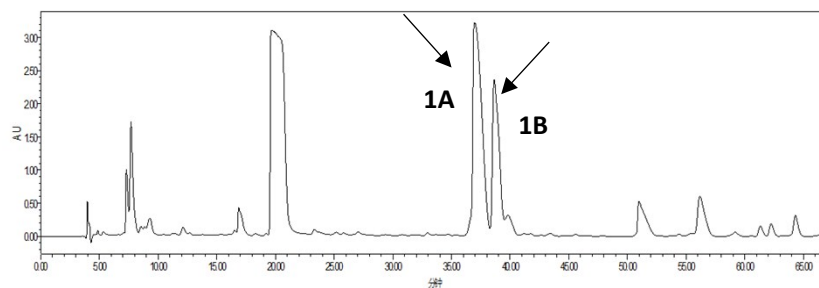

**Figure S11** HPLC separation spectrum of sulfilimine **1A** and **1B**

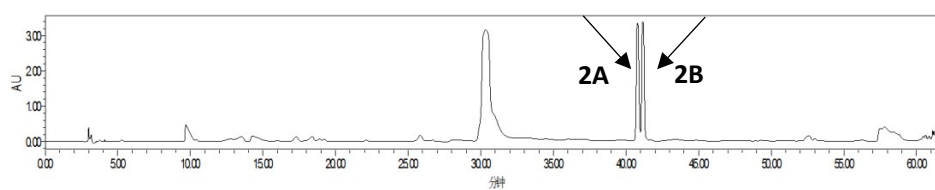

**Figure S12** HPLC separation spectrum of sulfilimine **2A** and **2B**

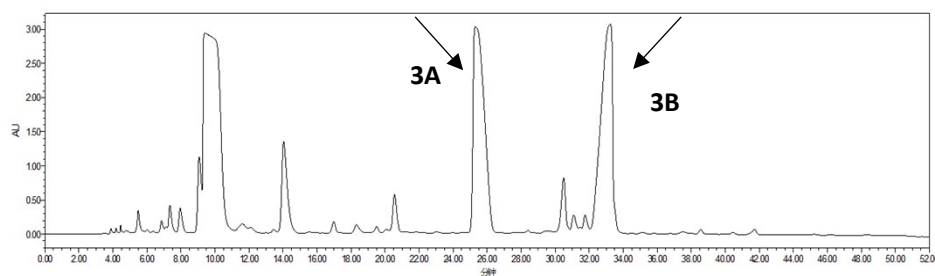

**Figure S13** HPLC separation spectrum of sulfilimine **3A** and **3B**

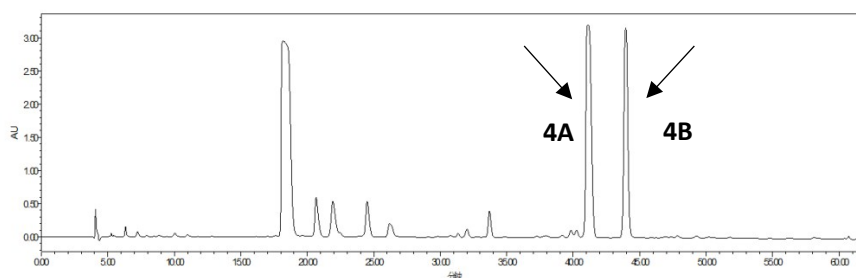

**Figure S14** HPLC separation spectrum of sulfilimine **4A** and **4B**

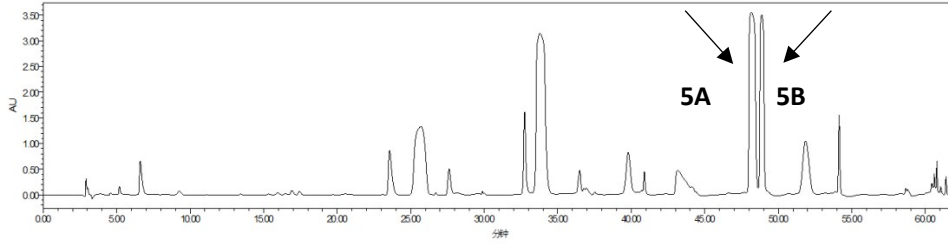

**Figure S15** HPLC separation spectrum of sulfilimine 5A and 5B

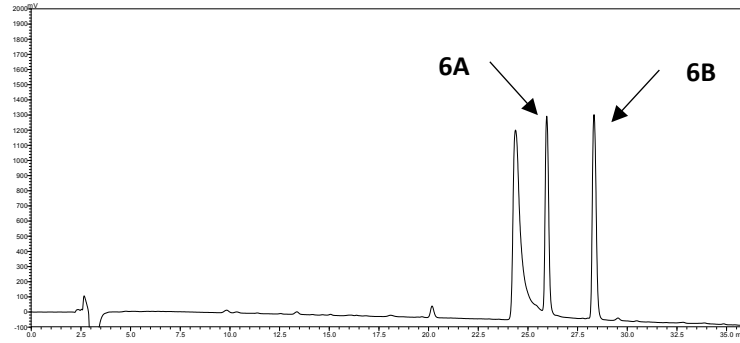

**Figure S16** HPLC separation spectrum of sulfilimine 6A and 6B

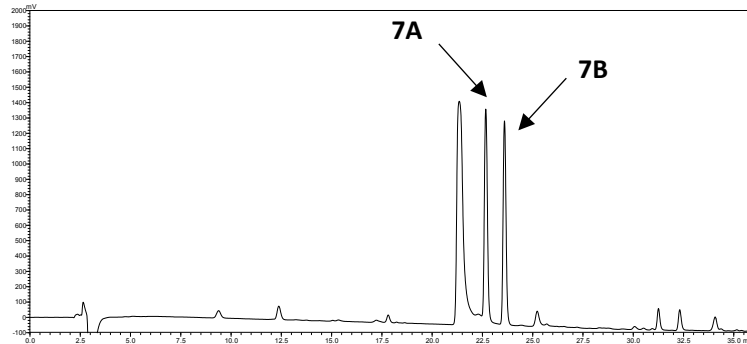

**Figure S17** HPLC separation spectrum of sulfilimine 7A and 7B

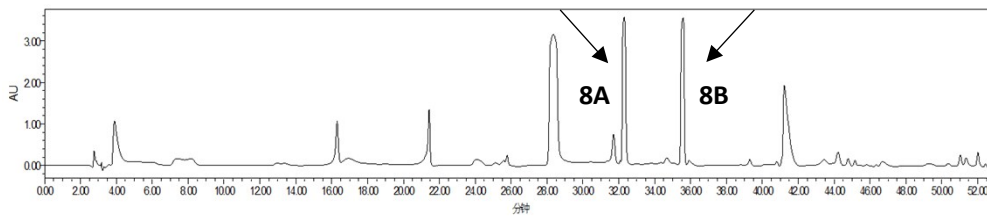

**Figure S18** HPLC separation spectrum of sulfilimine 8A and 8B

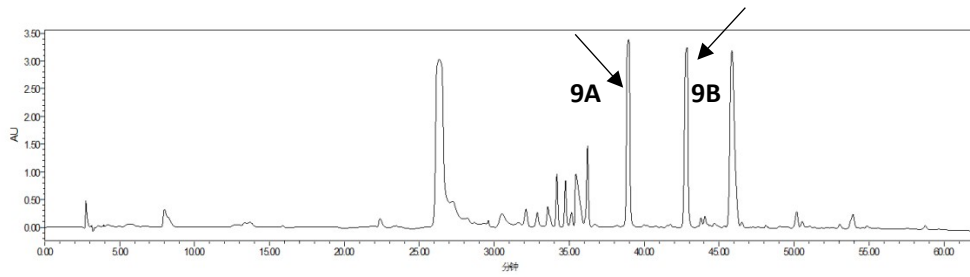

**Figure S19 HPLC separation spectrum of sulfilimine 9A and 9B**

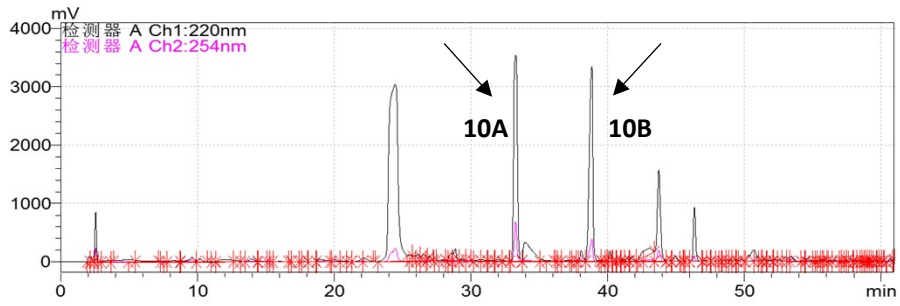

**Figure S20 HPLC separation spectrum of sulfilimine 10A and 10B**

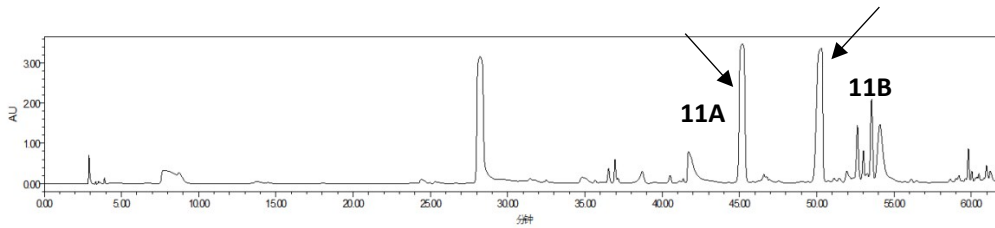

**Figure S21 HPLC separation spectrum of sulfilimine 11A and 11B**

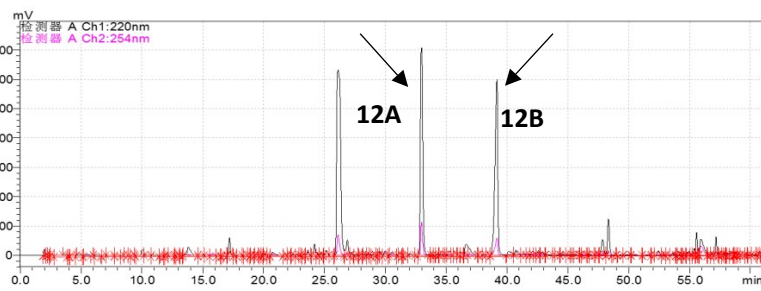

**Figure S22 HPLC separation spectrum of sulfilimine 12A and 12B**

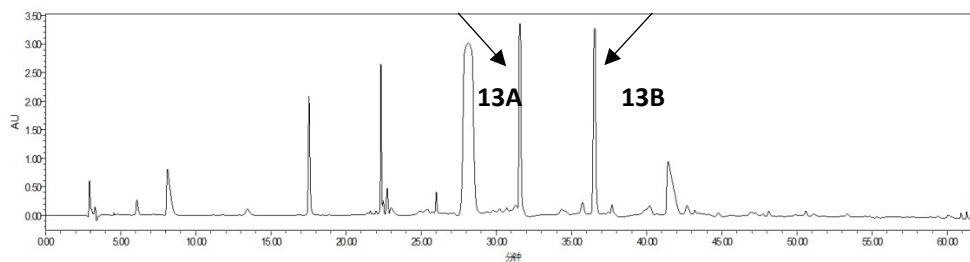

**Figure S23 HPLC separation spectrum of sulfilimine 13A and 13B**

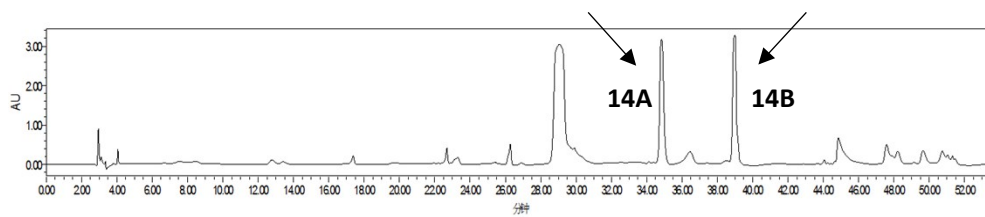

**Figure S24** HPLC separation spectrum of sulfilimine **14A** and **14B**

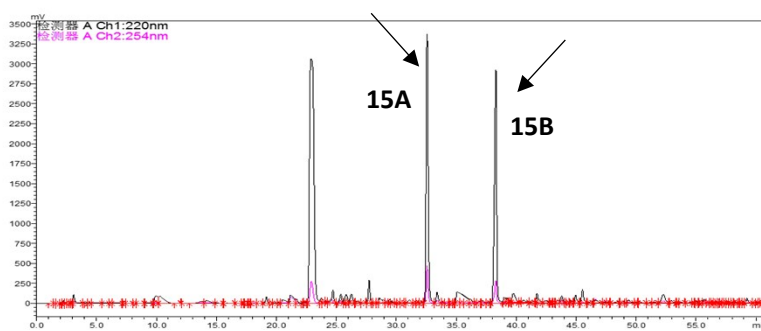

**Figure S25** HPLC separation spectrum of sulfilimine **15A** and **15B**

### **<sup>1</sup>H NMR spectra**

N-acetyl-S-(3-phenylpropyl)-L-cysteine



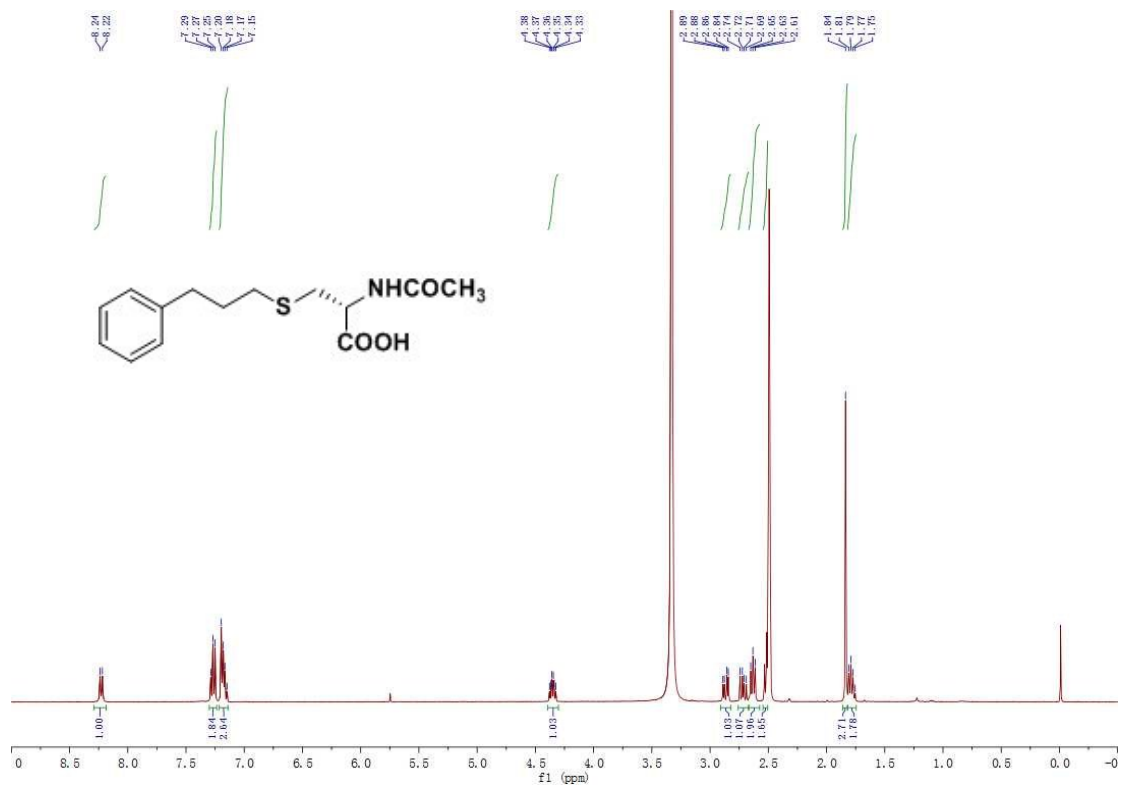

methyl N-acetyl-S-(3-phenylpropyl)-L-cysteinate

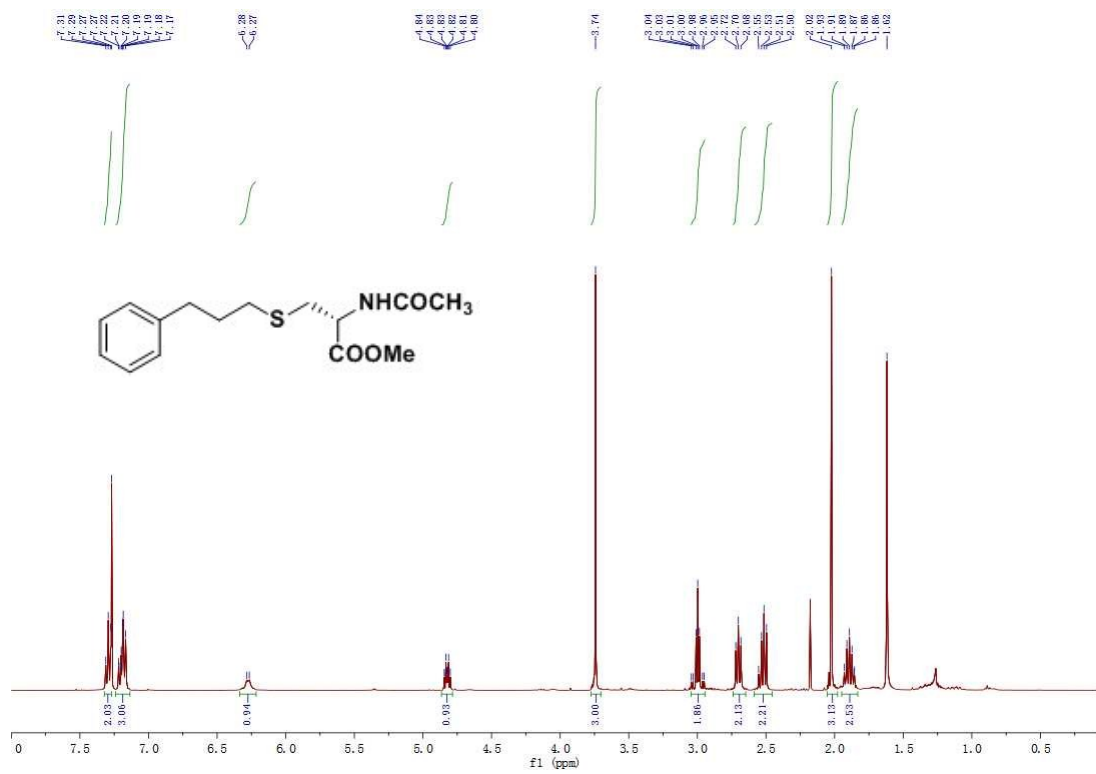

(S)-2-((((9H-fluoren-9-yl)methoxy)carbonyl)amino)pent-4-enoic acid

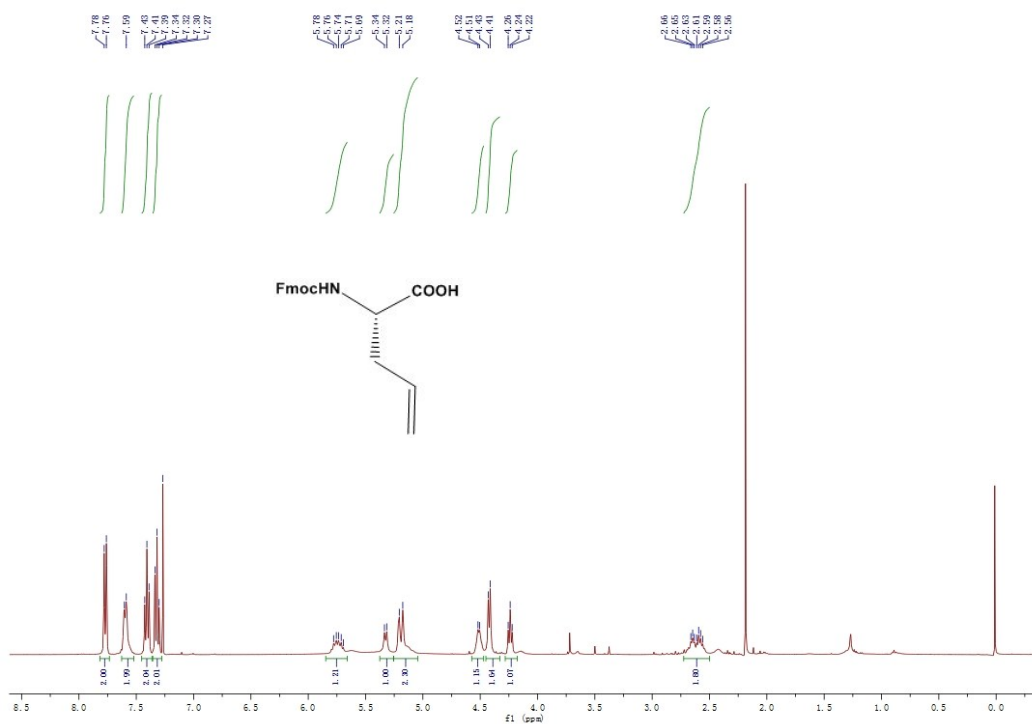

(S)-2-((((9H-fluoren-9-yl)methoxy)carbonyl)amino)hept-6-enoic acid

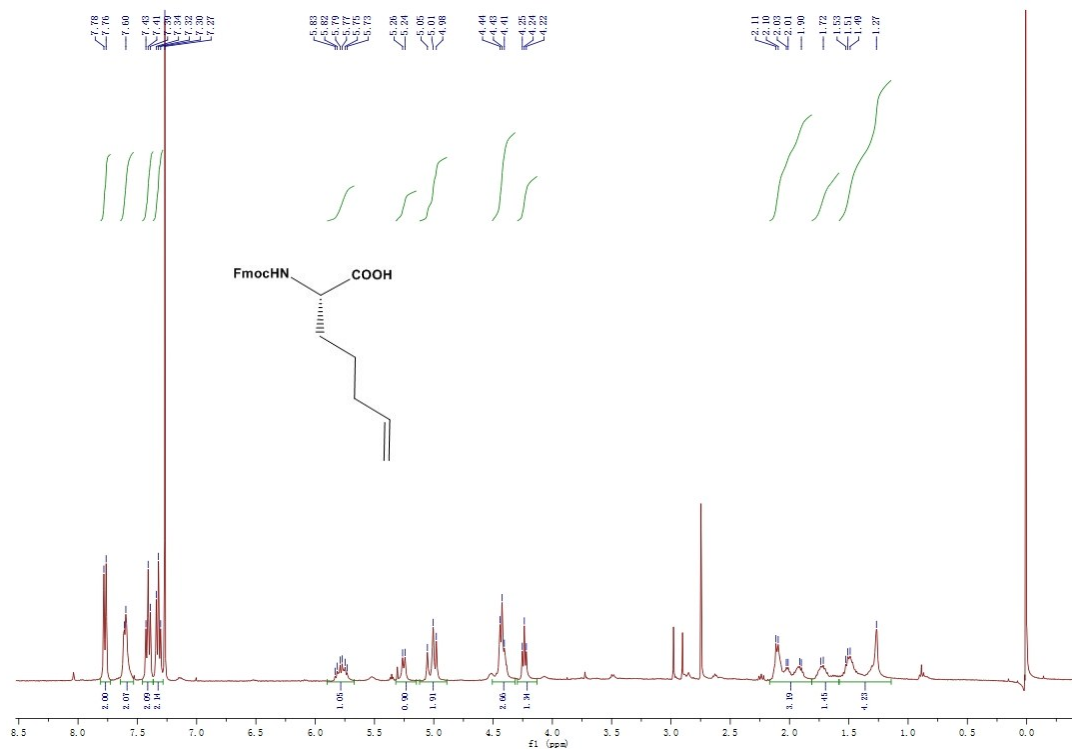

(S)-2-((((9H-fluoren-9-yl)methoxy)carbonyl)amino)oct-7-enoic acid

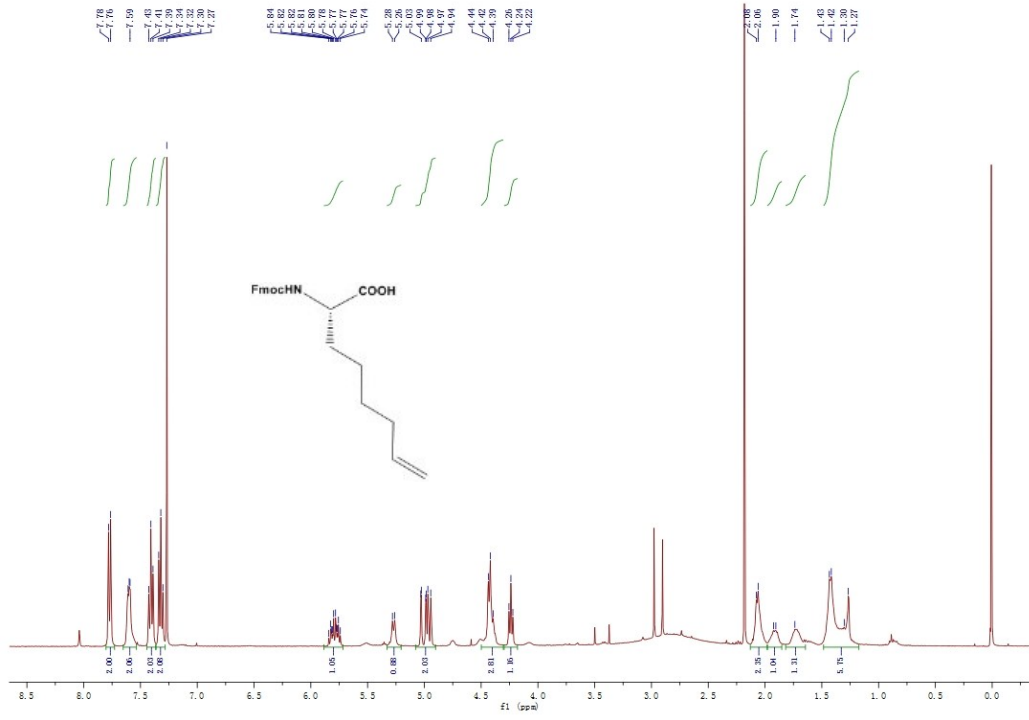

LC-MS spectra of peptides 1~15

Ac-(cyclo-1,5)-[S<sub>3</sub>AAAC(NTs)]-NH<sub>2</sub> **1A**

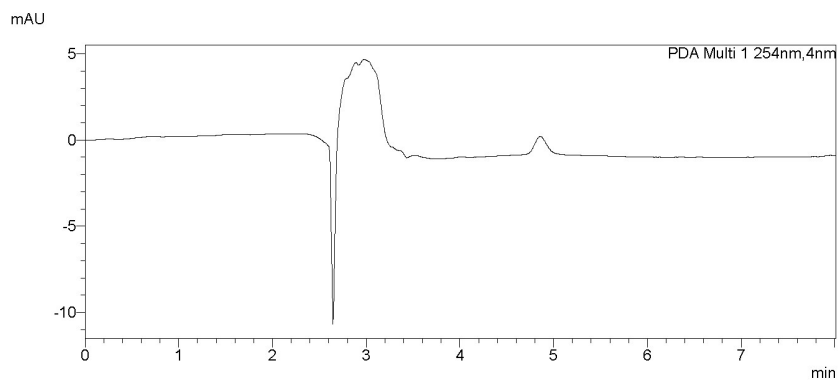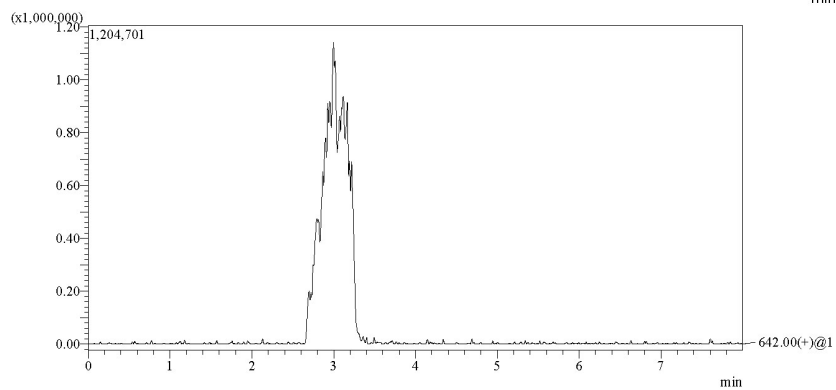

R. Time: 3.185 (Scan#: 911)  
MassPeaks: 12  
Segment 1 - Event 1

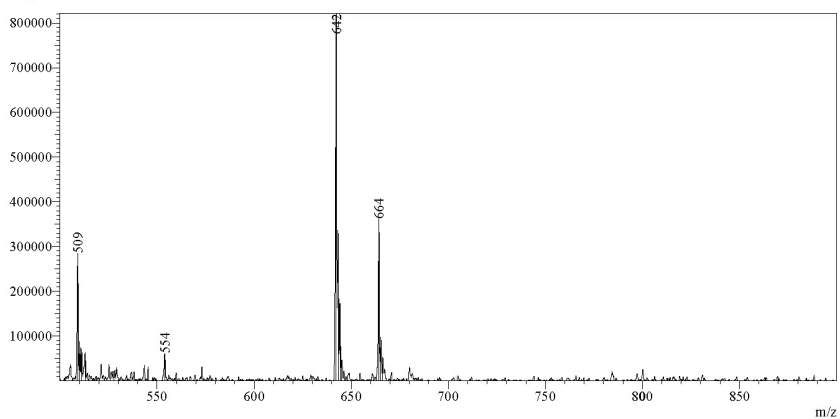

Ac-(cyclo-1,5)-[S<sub>3</sub>AAAC(NTs)]-NH<sub>2</sub> **1B**

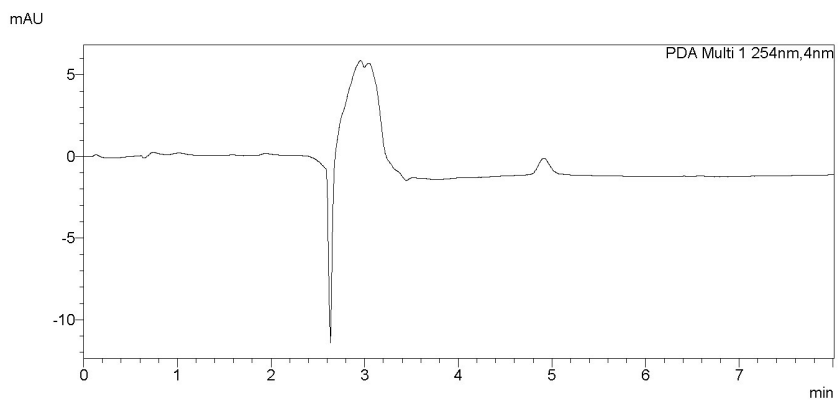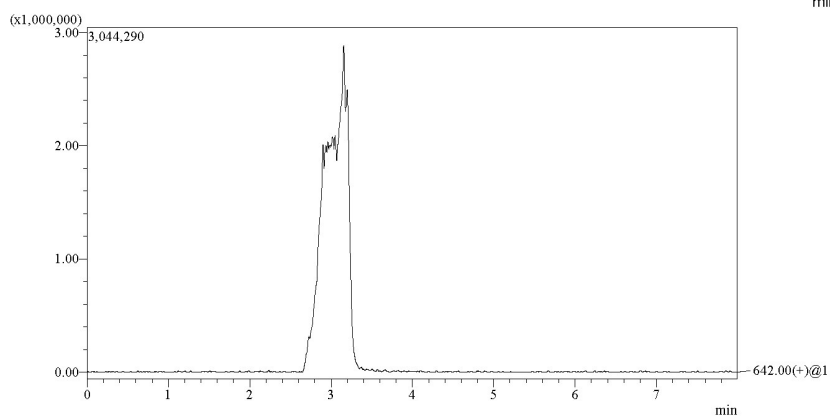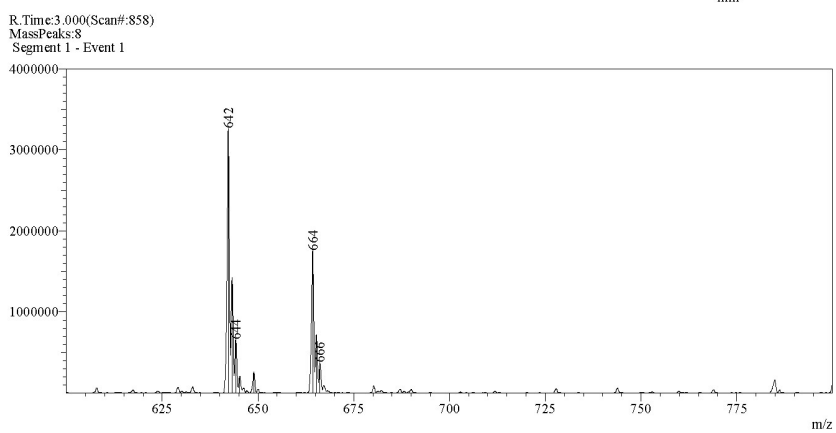

Ac-(cyclo-1,5)-[S<sub>4</sub>AAAC(NTs)]-NH<sub>2</sub> **2A**

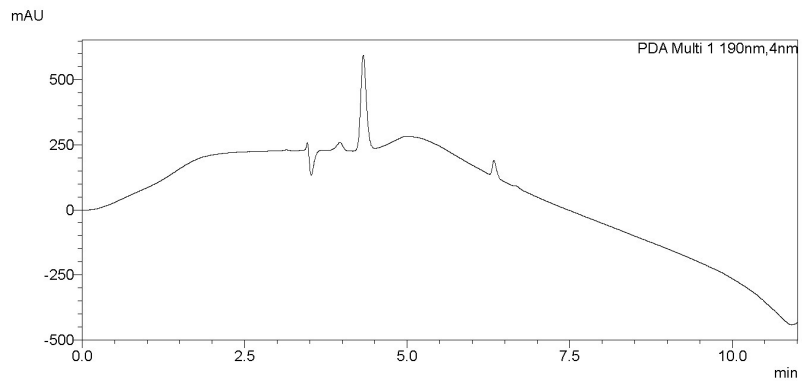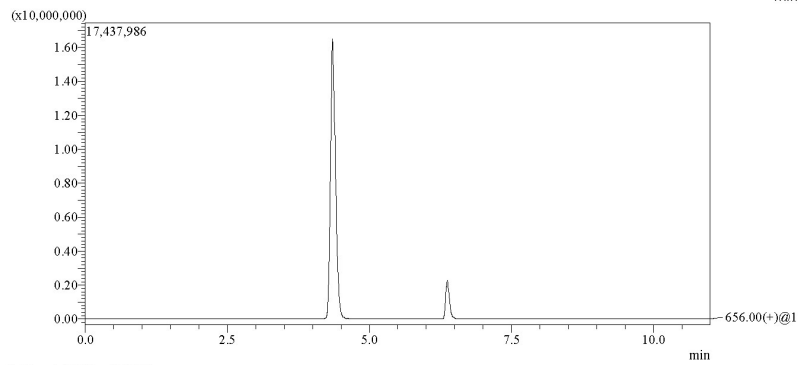

R.Time:4.400(Scan#:1258)  
MassPeaks:10  
Segment 1 - Event 1

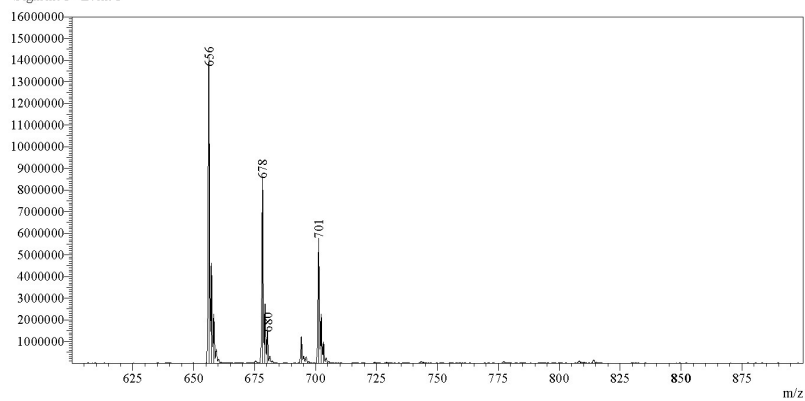

Ac-(cyclo-1,5)-[S<sub>4</sub>AAAC(NTs)]-NH<sub>2</sub> **2B**

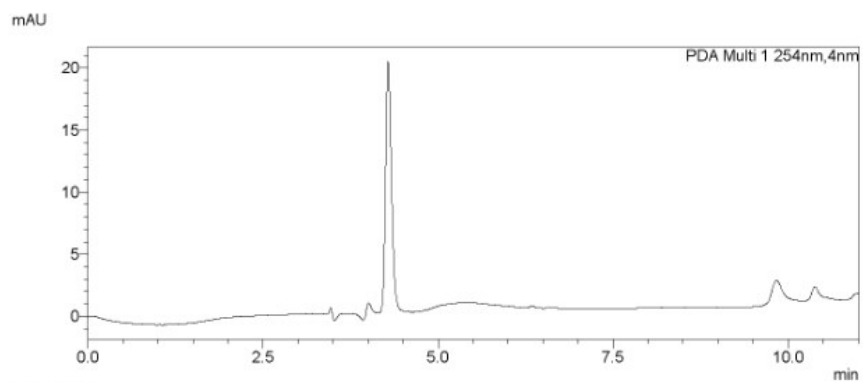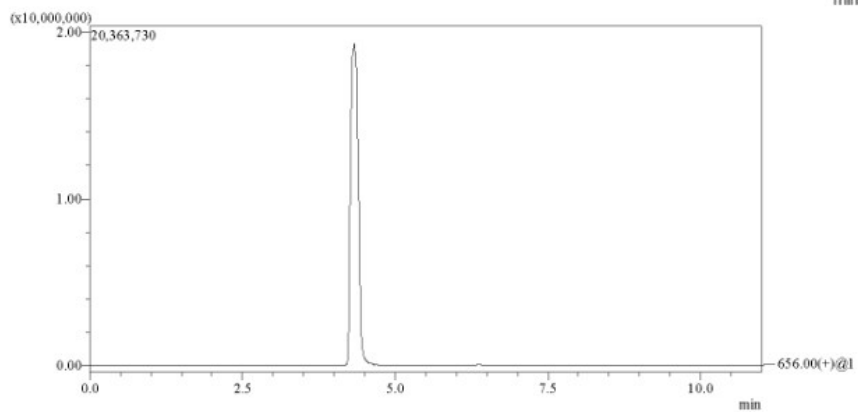

R. Time: 4.400(Scan#:1258)  
 MassPeaks:10  
 Segment 1 - Event 1

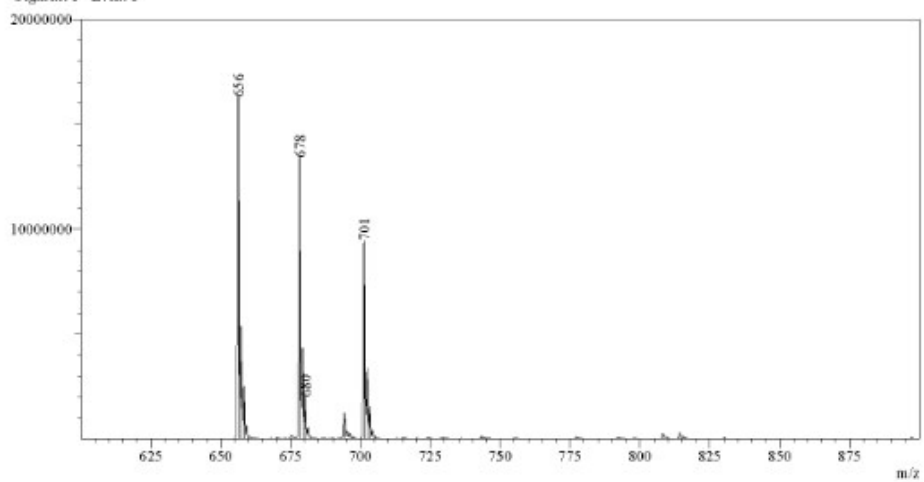

Ac-(cyclo-1,5)-[S<sub>5</sub>AAAC(NTs)]-NH<sub>2</sub> **3A**

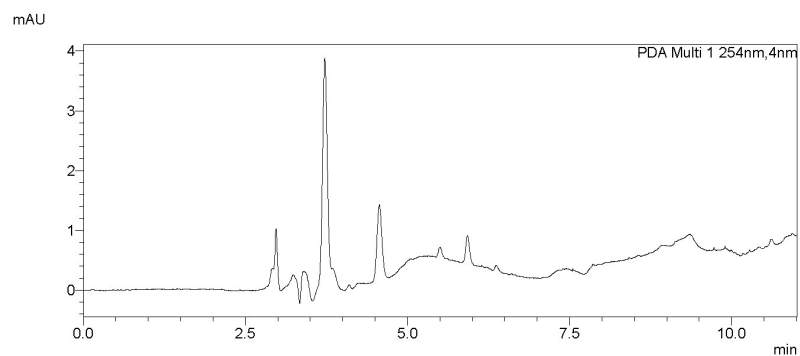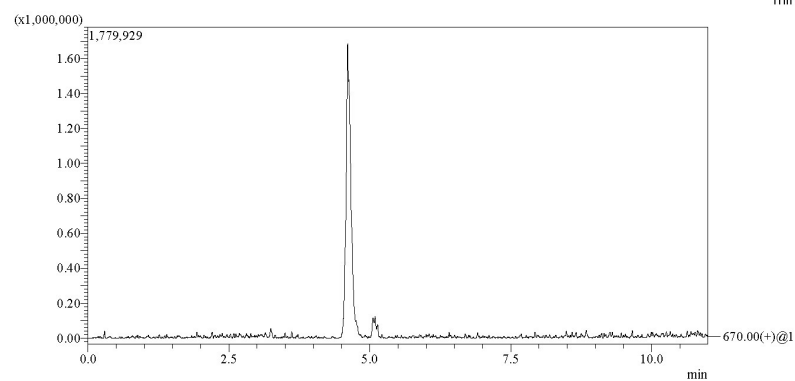

R-Time:4.599(Scan#:1315)  
MassPeak:6  
Segment 1 - Event 1

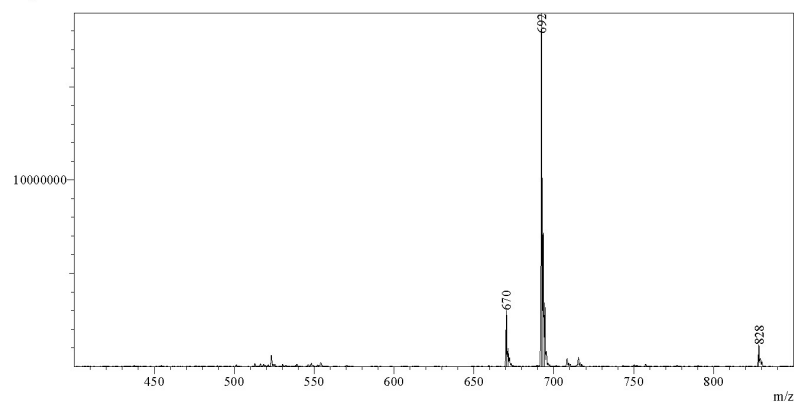

Ac-(cyclo-1,5)-[S<sub>5</sub>AAAC(NTs)]-NH<sub>2</sub> **3B**



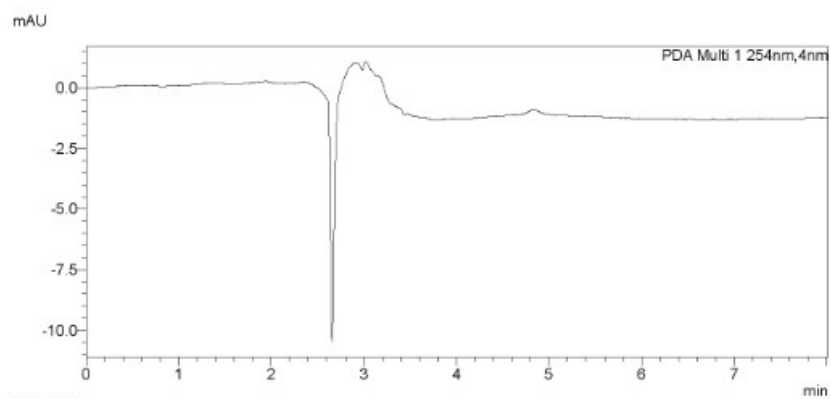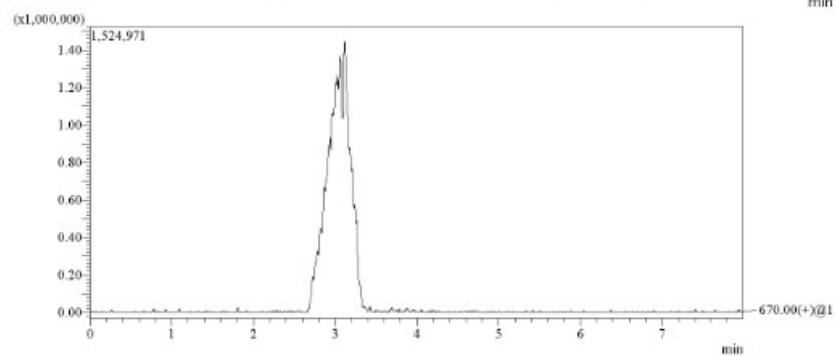

R. Time: 3.000(Scan#: 858)  
 MassPeaks: 10  
 Segment 1 - Event 1

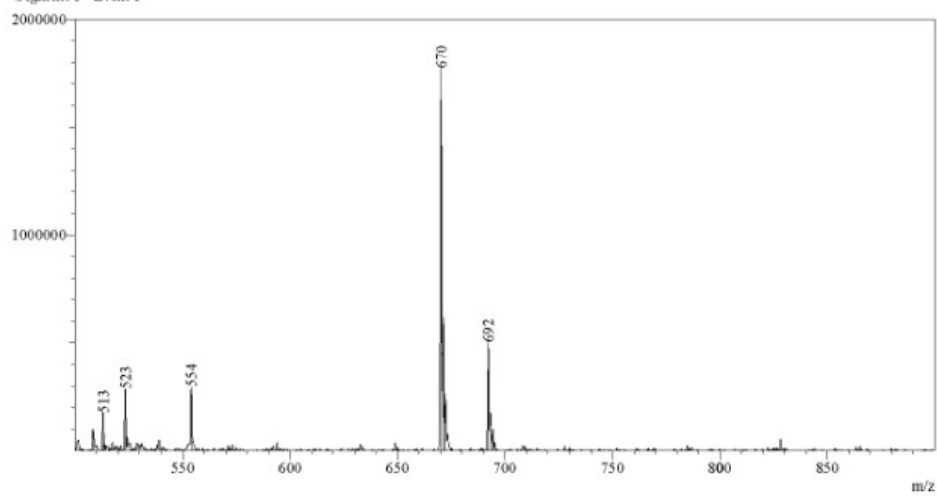

Ac-(cyclo-1,5)-[S<sub>6</sub>AAAC(NTs)]-NH<sub>2</sub> **4A**

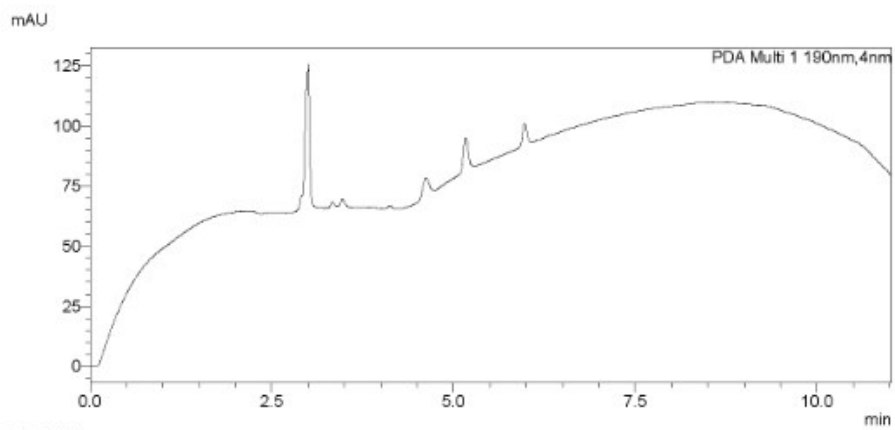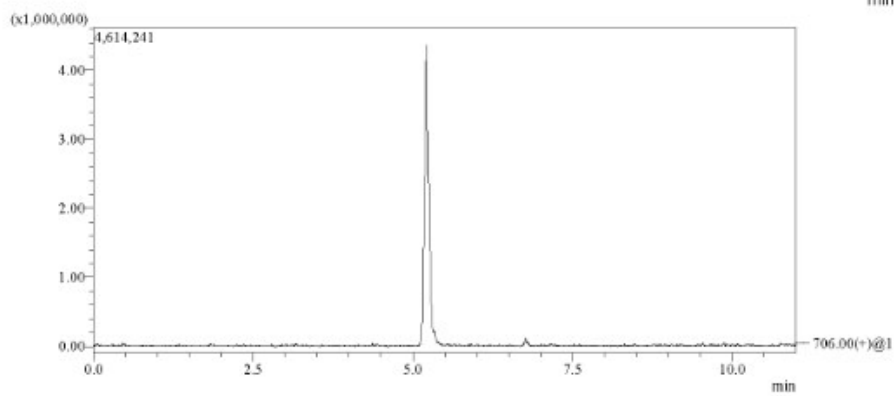

R. Time: 5.198(Scan#:1486)  
 MassPeaks: 8  
 Segment 1 - Event 1

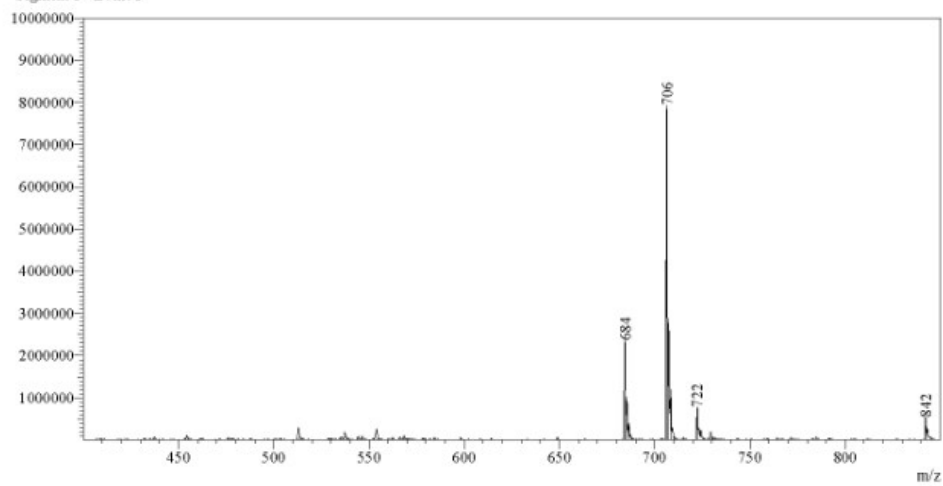

Ac-(cyclo-1,5)-[S<sub>6</sub>AAAC(NTs)]-NH<sub>2</sub> **4B**

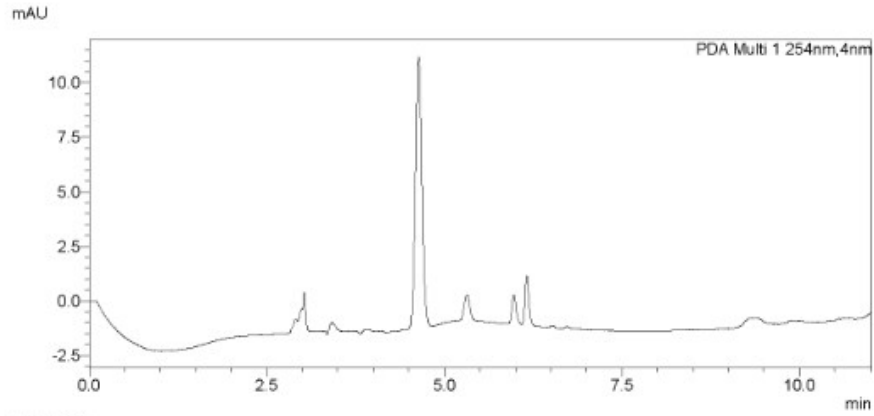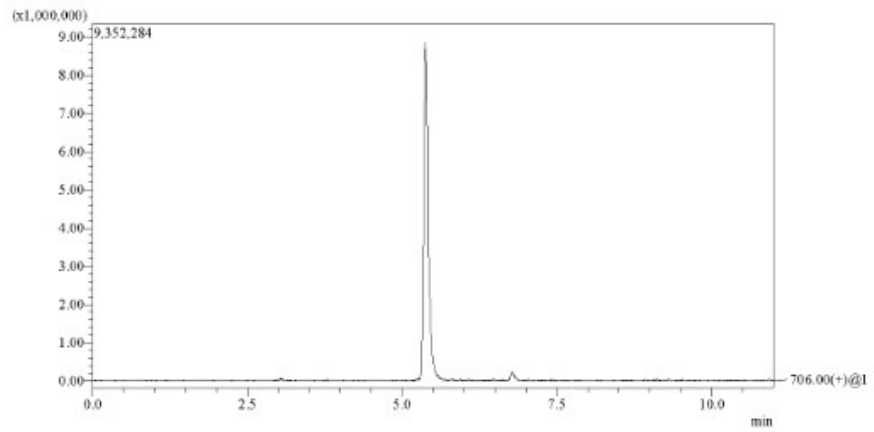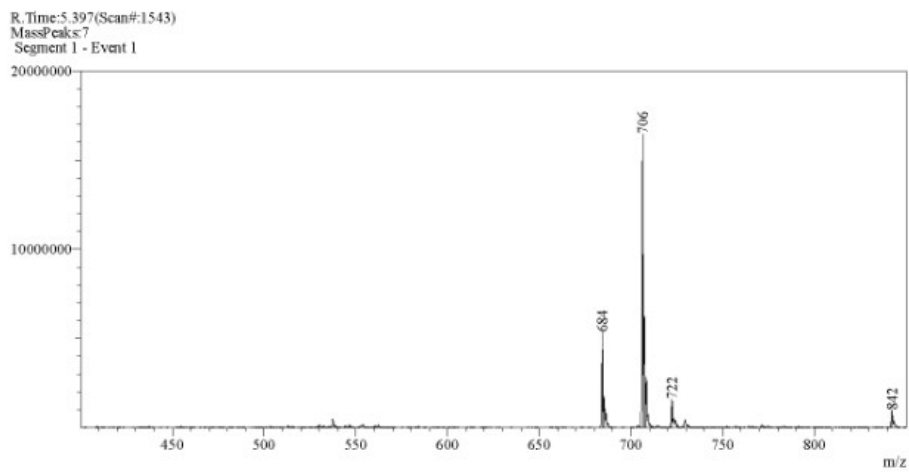

Ac-(cyclo-1,5)-[C(NTs)AAAS<sub>5</sub>]-NH<sub>2</sub> **5A**

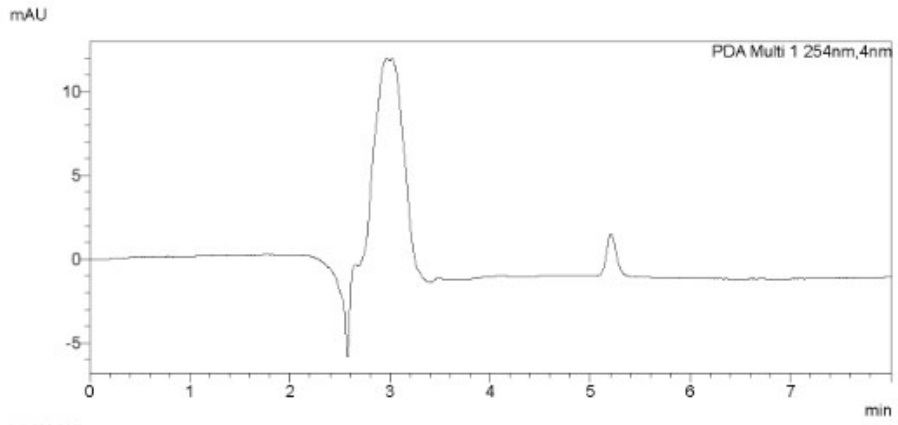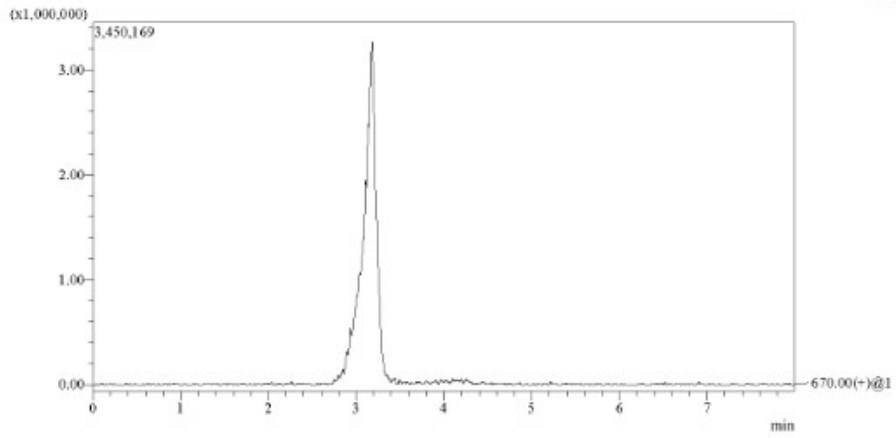

R.Time:3.248(Scan#:929)  
MassPeaks:6  
Segment 1 - Event 1

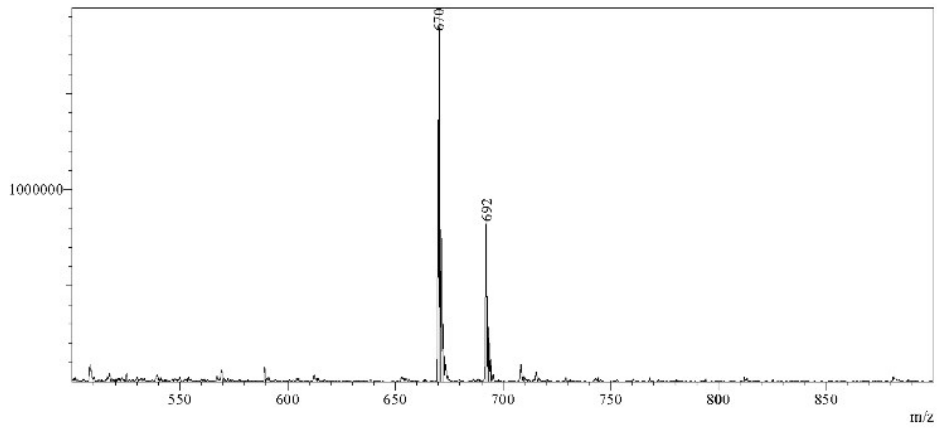

Ac-(cyclo-1,5)-[C(NTs)AAAS<sub>5</sub>]-NH<sub>2</sub> **5B**

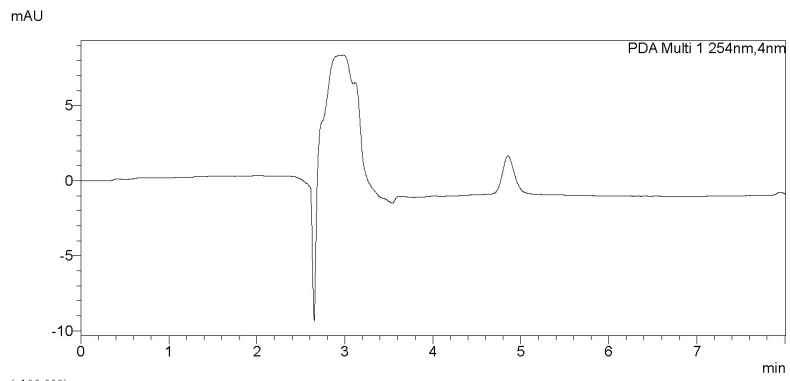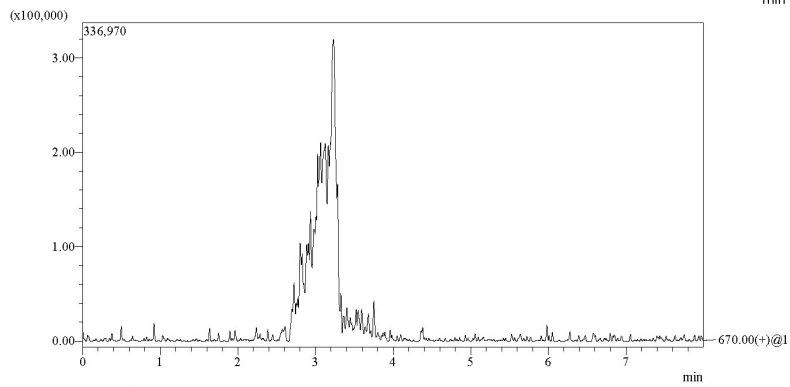

R. Time: 3.248(Scan#:929)  
MassPeaks:14  
Segment 1 - Event 1

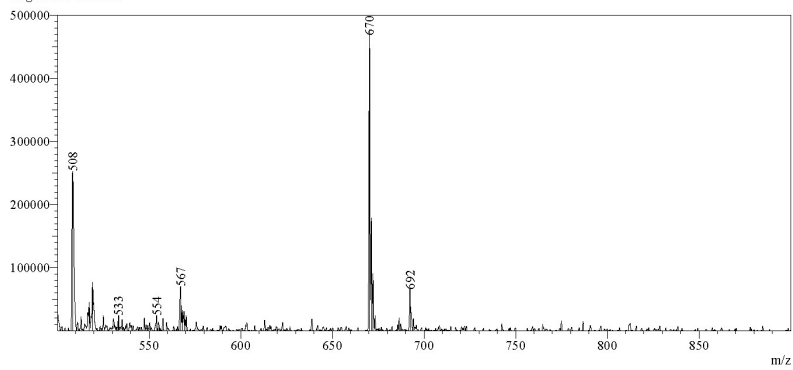

Ac-(cyclo-1,5)-[homoC(NTs)AAAS<sub>4</sub>]-NH<sub>2</sub> **6A**

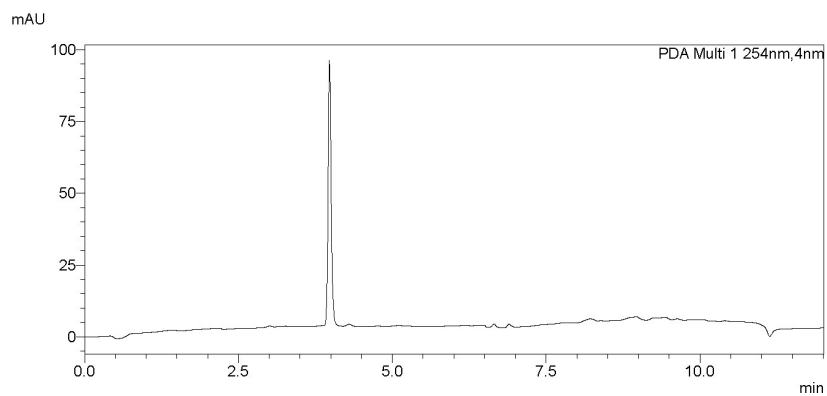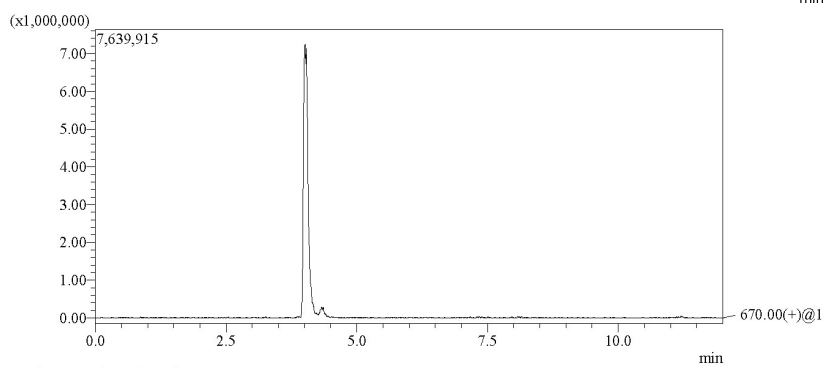

R.Time:3.997(Scan#:1143)  
MassPeaks:7  
Segment 1 - Event 1

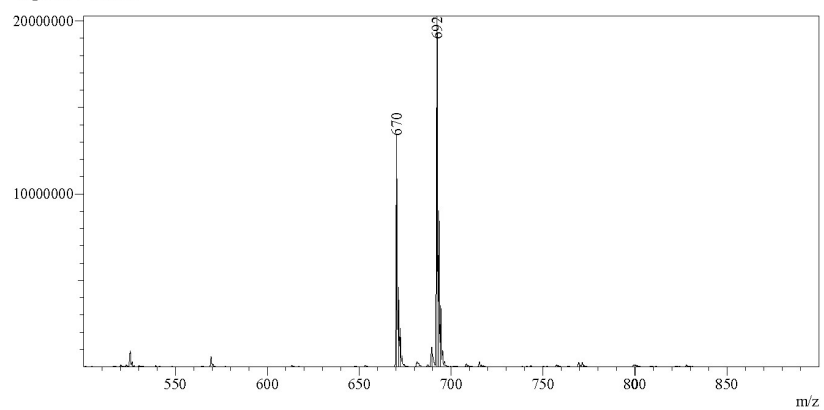

Ac-(cyclo-1,5)-[homoC(NTs)AAAS<sub>4</sub>]-NH<sub>2</sub> **6B**

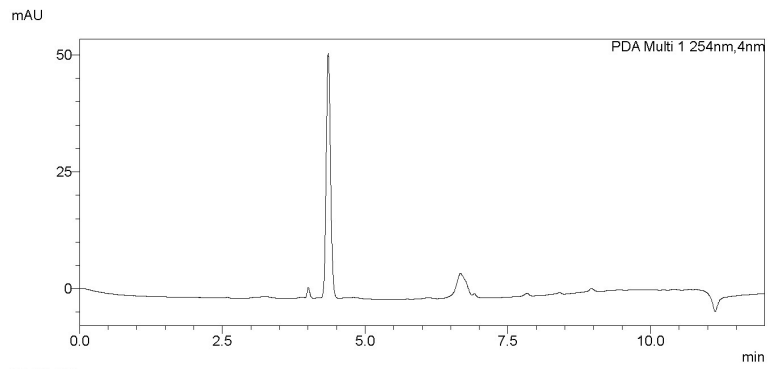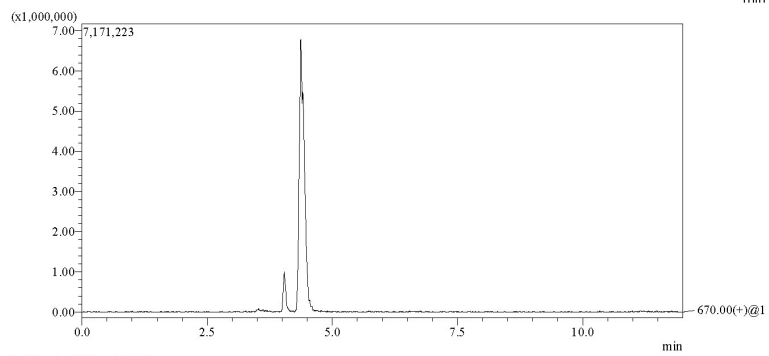

R. Time: 4.347 (Scan#: 1243)  
MassPeaks: 6  
Segment 1 - Event 1

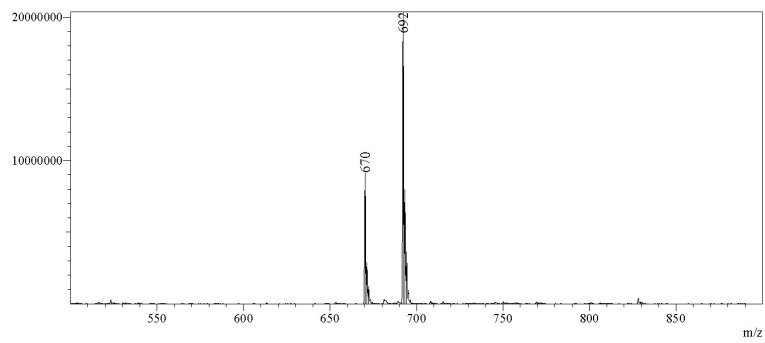

Ac-(cyclo-1,5)-[S<sub>4</sub>AAhomoC(NTs)]-NH<sub>2</sub> **7A**

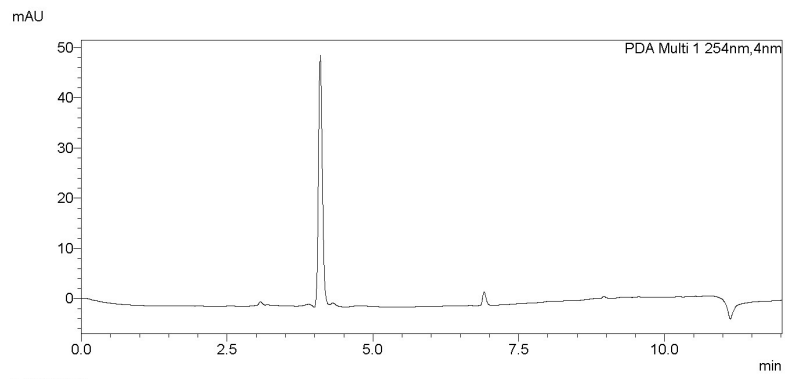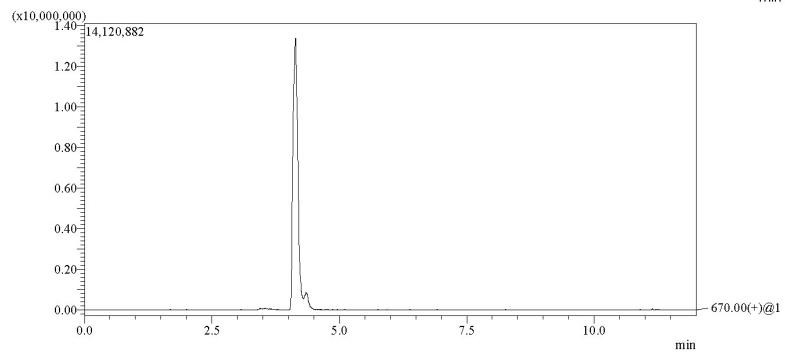

R.Time:4.099(Scan#:1172)  
MassPeaks:8  
Segment 1 - Event 1

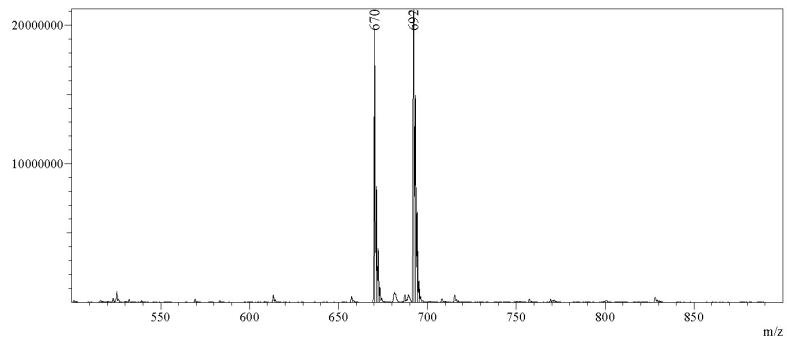

Ac-(cyclo-1,5)-[S<sub>4</sub>AAAhomoC(NTs)]-NH<sub>2</sub> **7B**



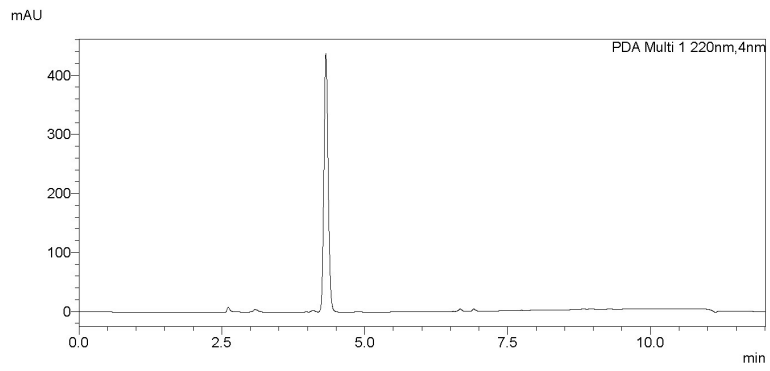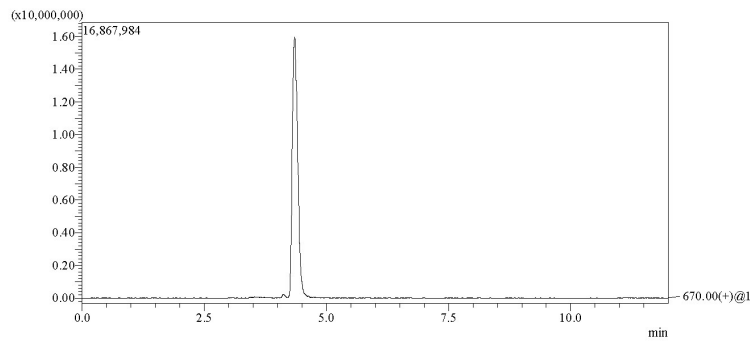

R.Time:4.298(Scan#:1229)  
MassPeaks:7  
Segment 1 - Event 1

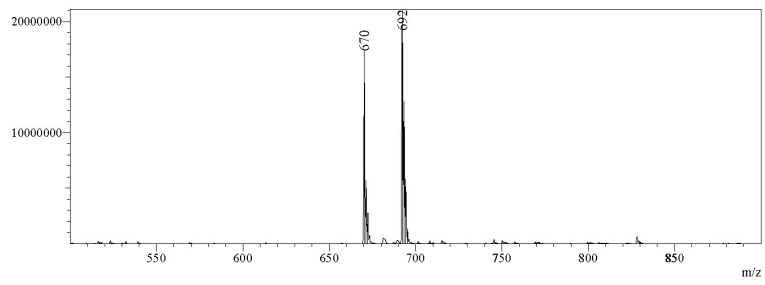

Ac-(cyclo-1,5)-[S<sub>5</sub>AGAC(NTs)]-NH<sub>2</sub> **8A**

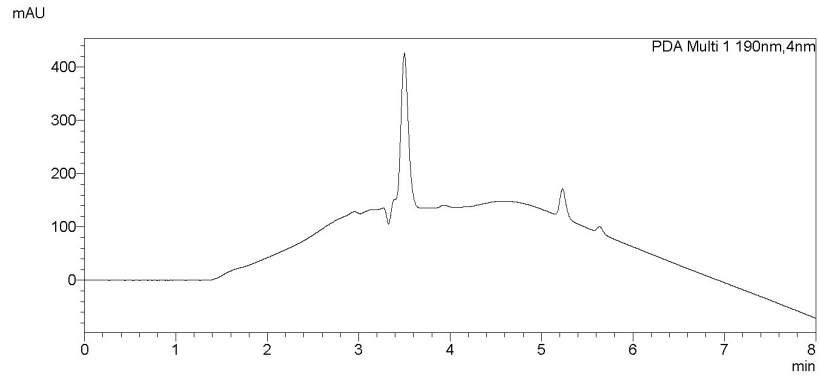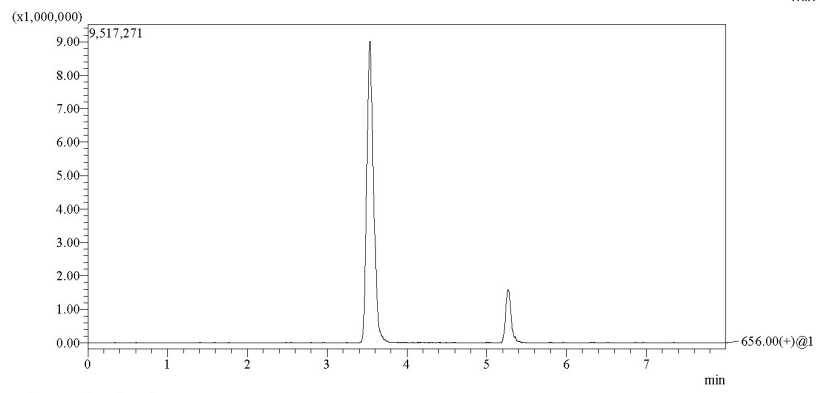

R. Time: 3.500(Scan#:1001)  
MassPeaks: 6  
Segment 1 - Event 1

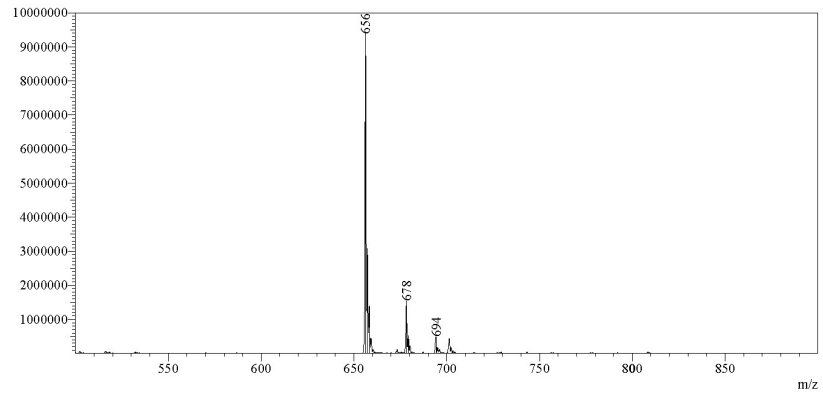

Ac-(cyclo-1,5)-[S<sub>5</sub>AGAC(NTs)]-NH<sub>2</sub> **8B**

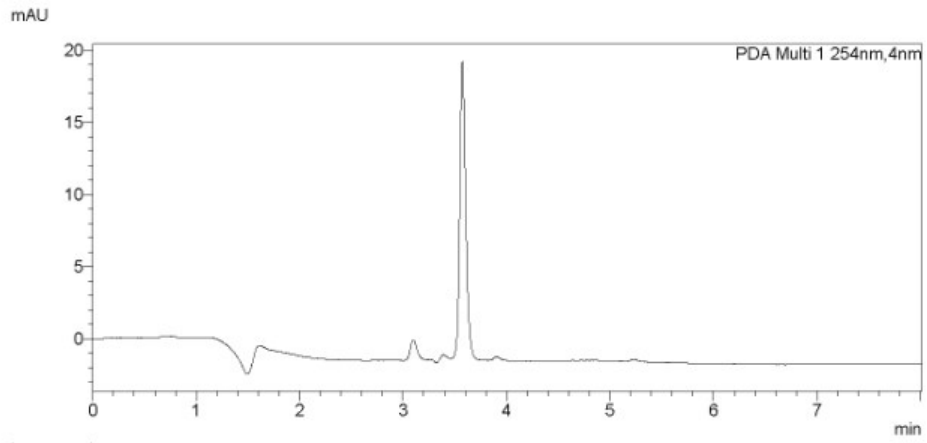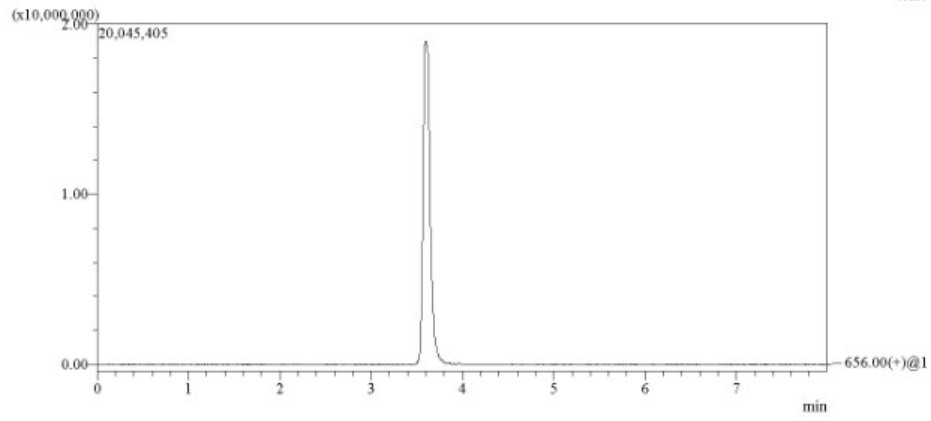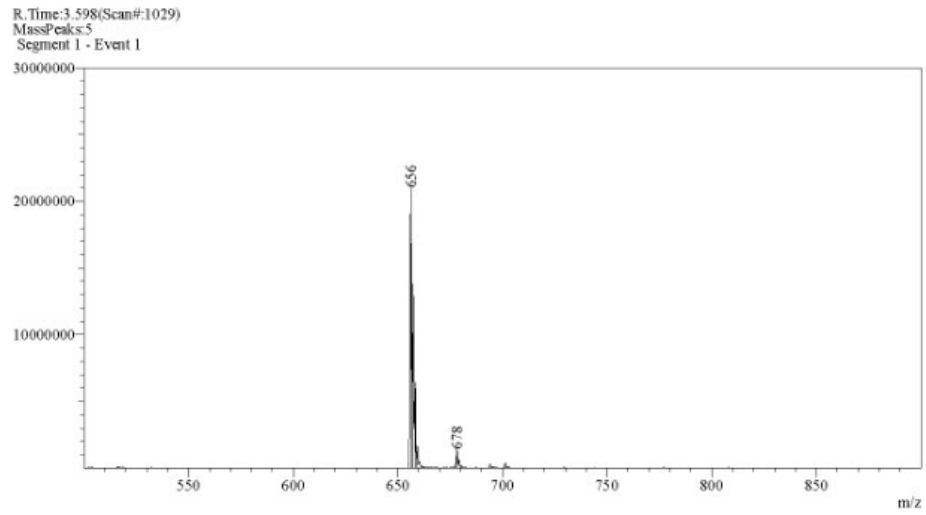

Ac-(cyclo-1,5)-[S<sub>5</sub>AFAC(NTs)]-NH<sub>2</sub> **9A**

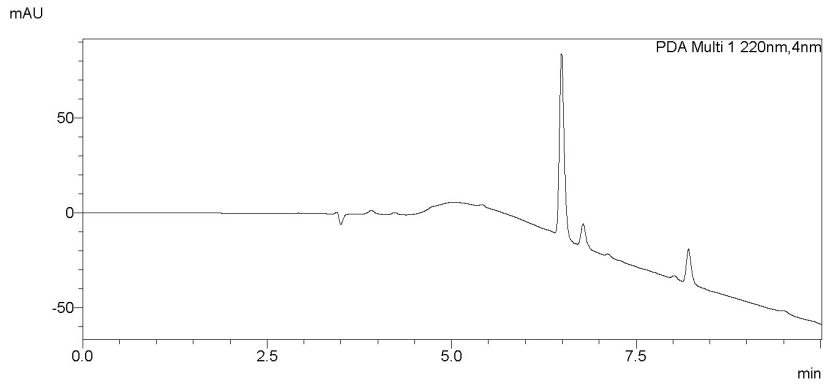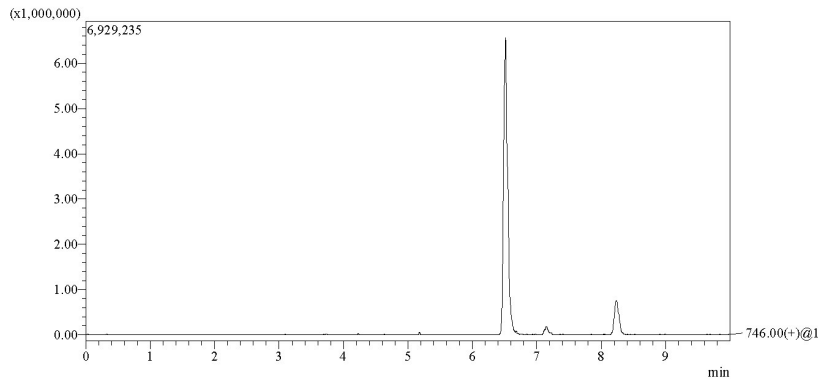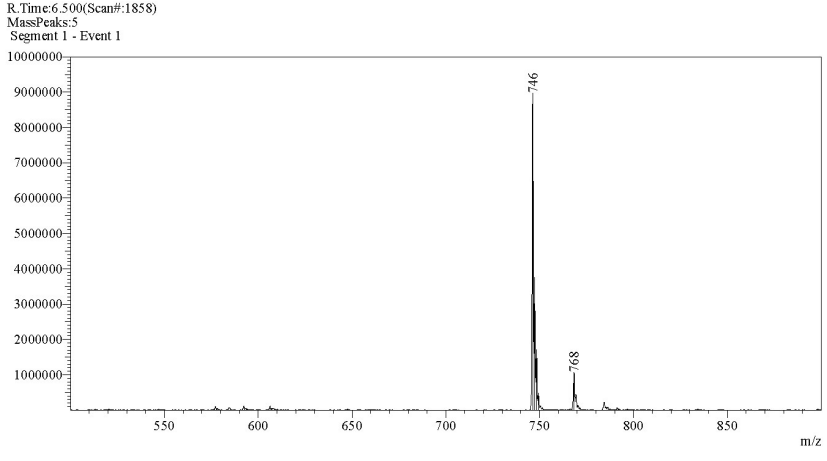

Ac-(cyclo-1,5)-[S<sub>5</sub>AFAC(NTs)]-NH<sub>2</sub> **9B**

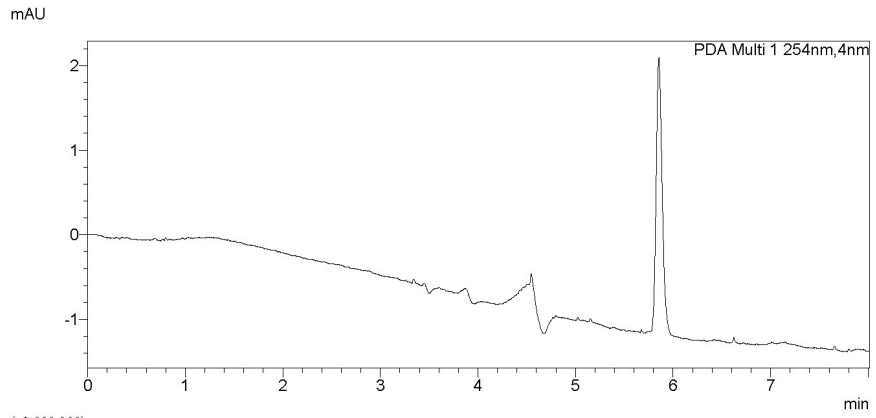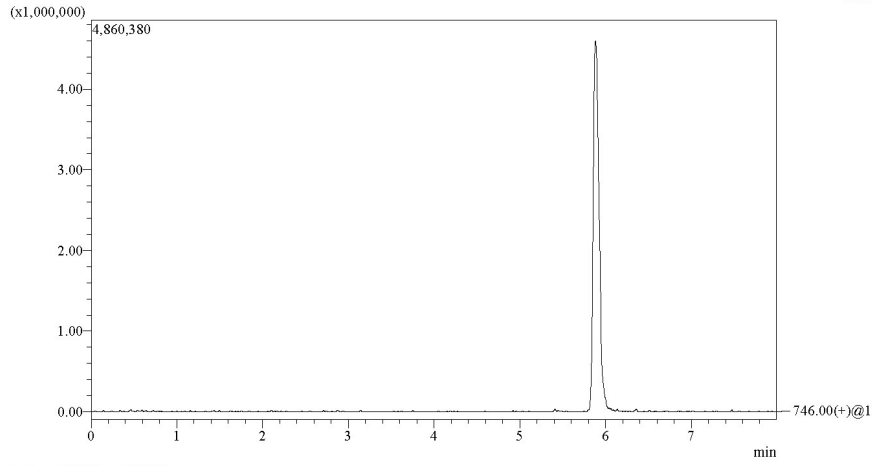

R.Time:5.898(Scan#:1686)  
MassPeaks:4  
Segment 1 - Event 1

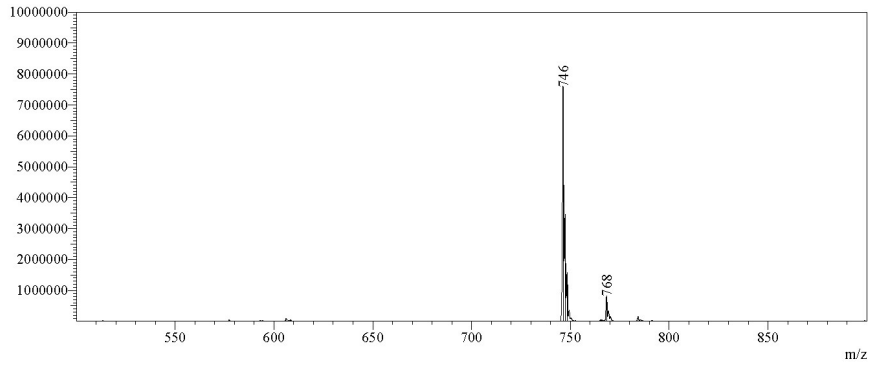

Ac-(cyclo-1,5)-[S<sub>5</sub>AIAC(NTs)]-NH<sub>2</sub> 10A

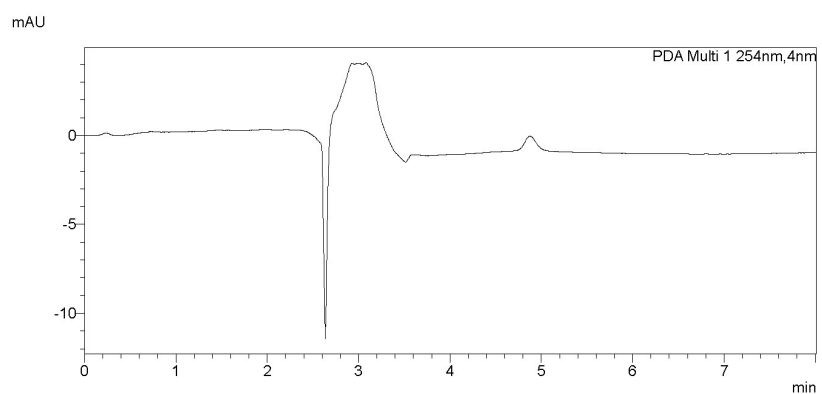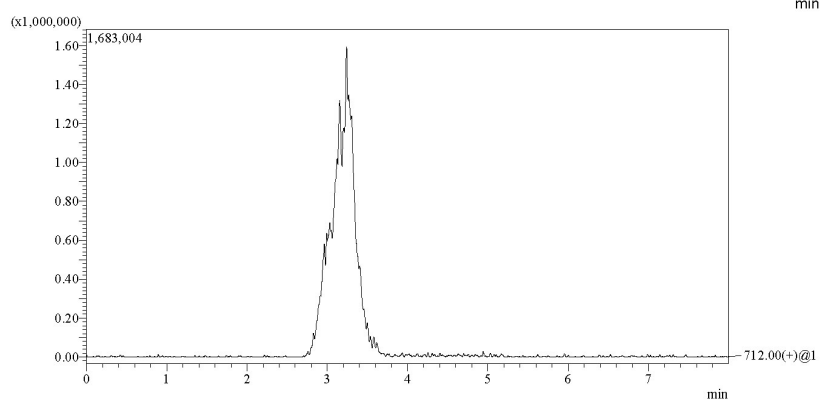

R. Time: 3.350 (Scan#: 958)  
MassPeaks: 5  
Segment 1 - Event 1

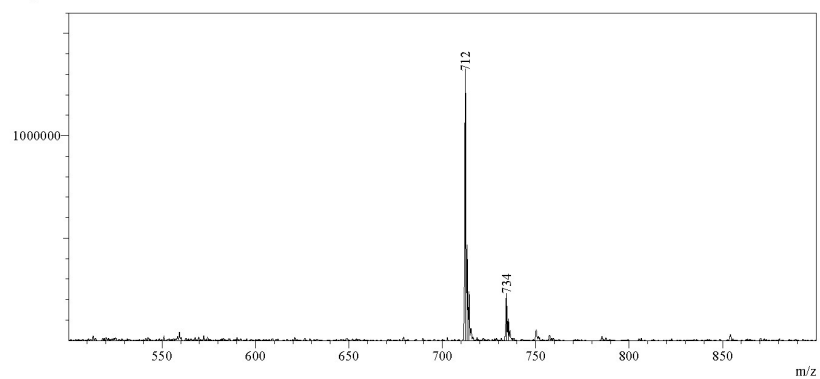

Ac-(cyclo-1,5)-[S<sub>5</sub>AIAC(NTs)]-NH<sub>2</sub> 10B

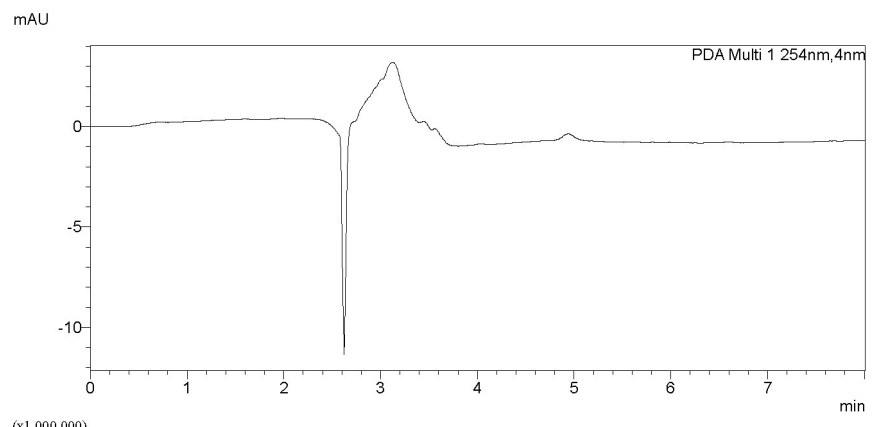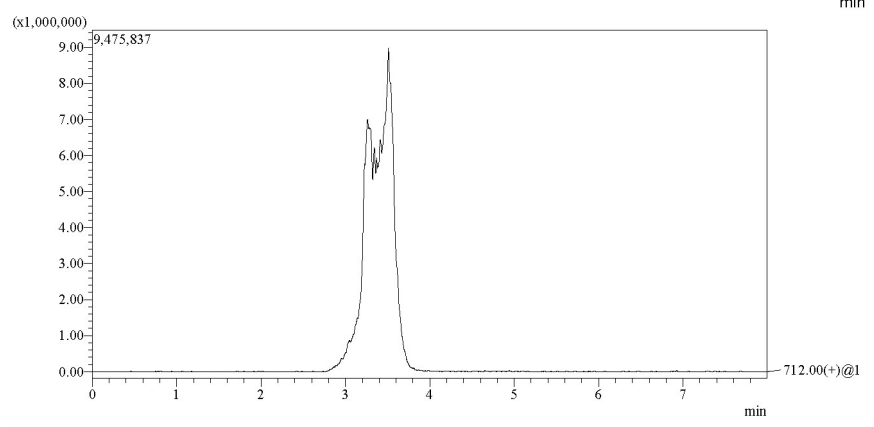

R\_Time:3.500(Scan#:1001)  
MassPeaks:6  
Segment 1 - Event 1

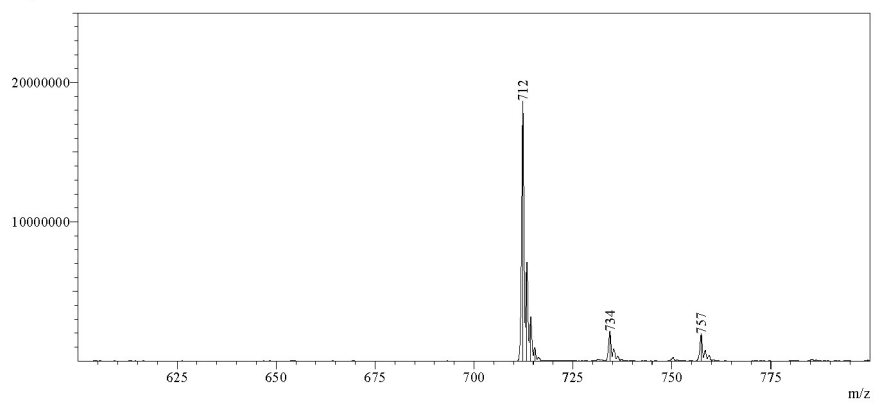

Ac-(cyclo-1,5)-[S<sub>5</sub>ALAC(NTs)]-NH<sub>2</sub> **11A**

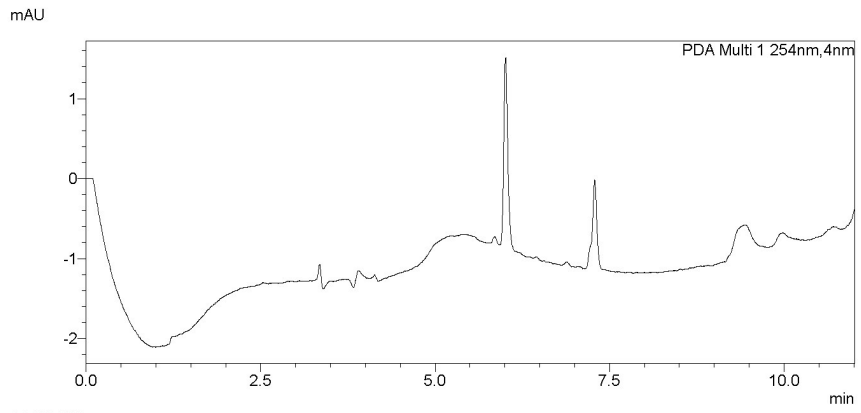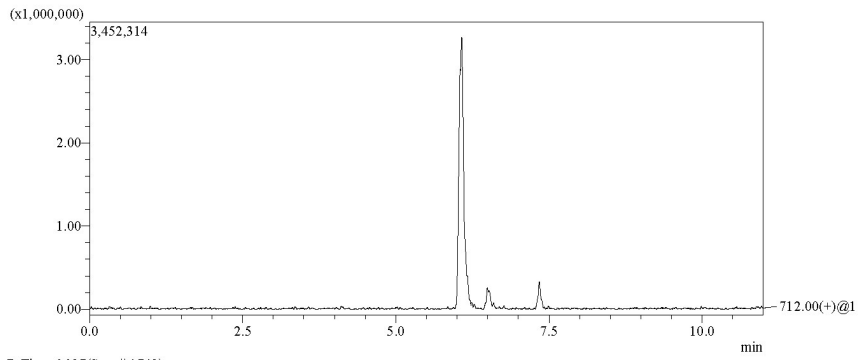

R. Time: 6.097(Scan#:1743)  
MassPeaks:6  
Segment 1 - Event 1

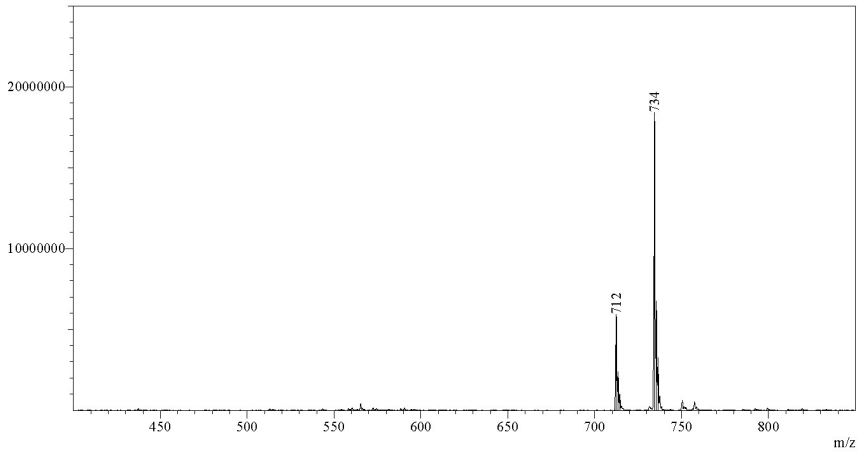



Ac-(cyclo-1,5)-[S<sub>5</sub>ALAC(NTs)]-NH<sub>2</sub> **11B**

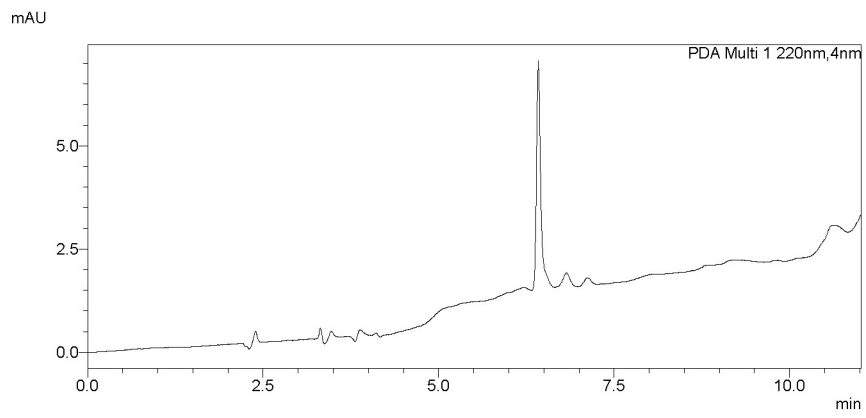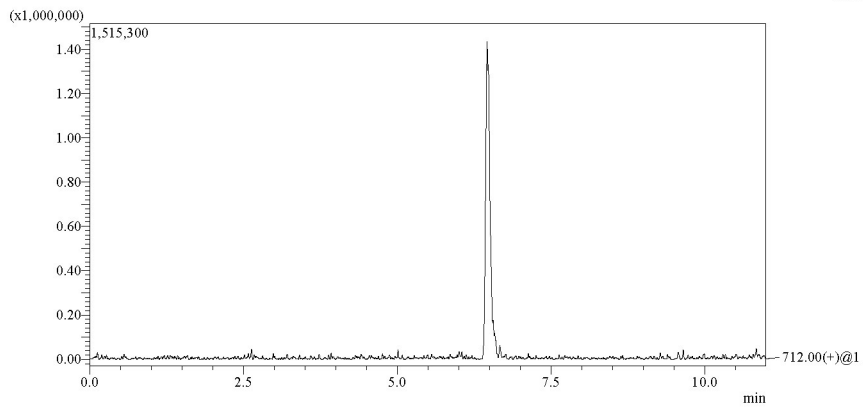

R. Time: 6.500(Scan#:1858)  
MassPeaks:6  
Segment 1 - Event 1

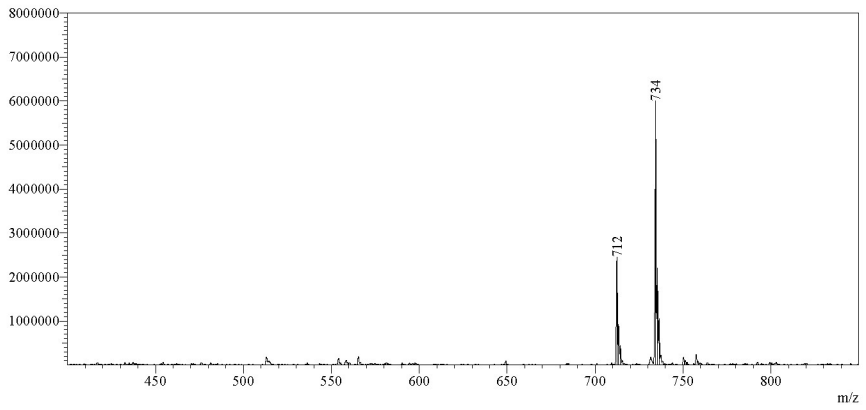

Ac-(cyclo-1,5)-[S<sub>5</sub>AVAC(NTs)]-NH<sub>2</sub> **12A**

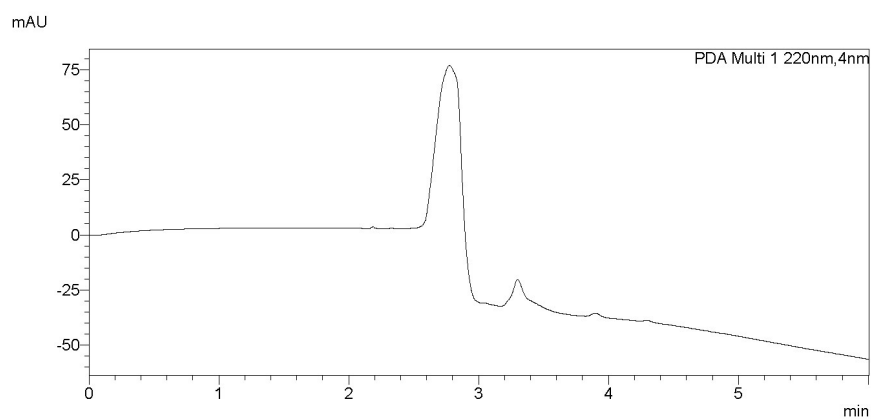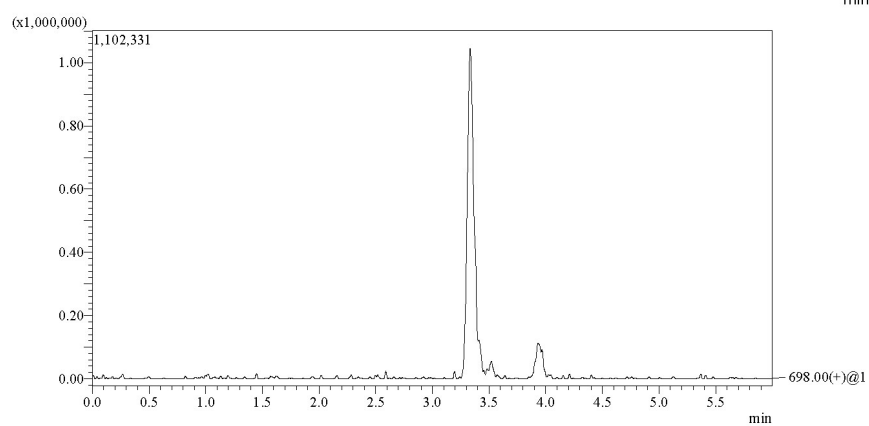

R.Time:3.297(Scan#:943)  
MassPeaks:10  
Segment 1 - Event 1

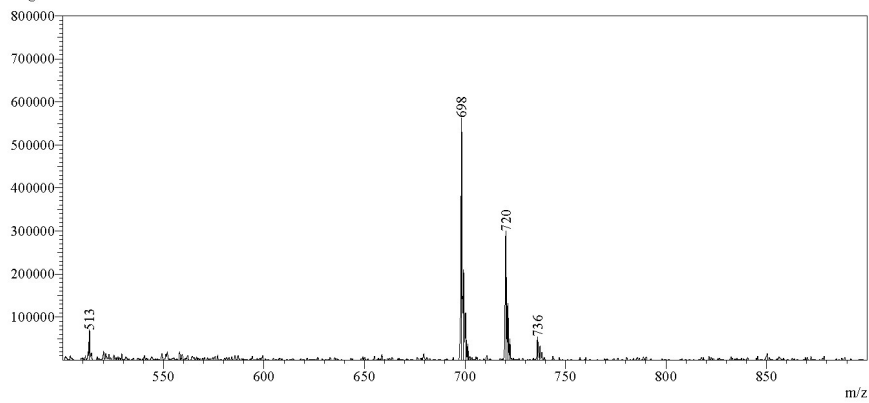

Ac-(cyclo-1,5)-[S<sub>5</sub>AVAC(NTs)]-NH<sub>2</sub> 12B

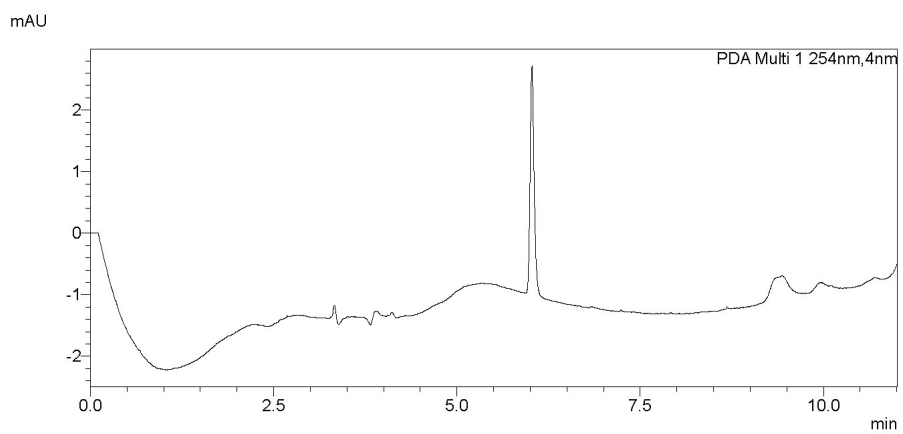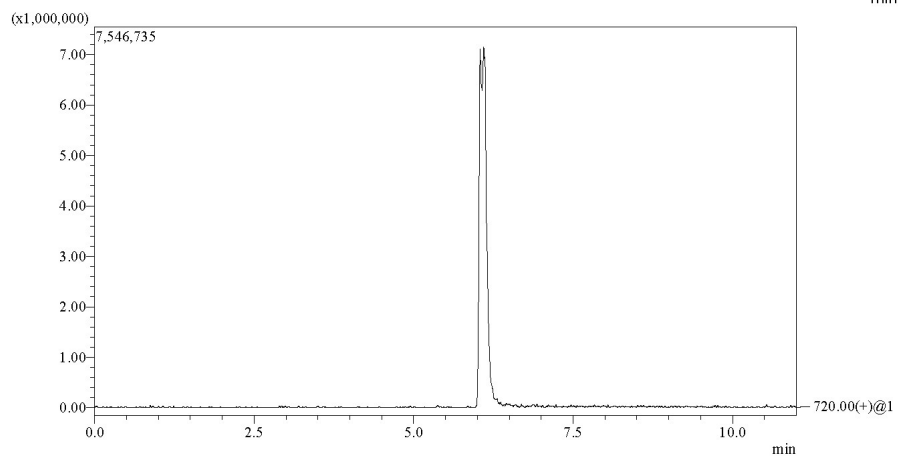

R. Time: 6.097 (Scan#: 1743)  
MassPeaks: 7  
Segment 1 - Event 1

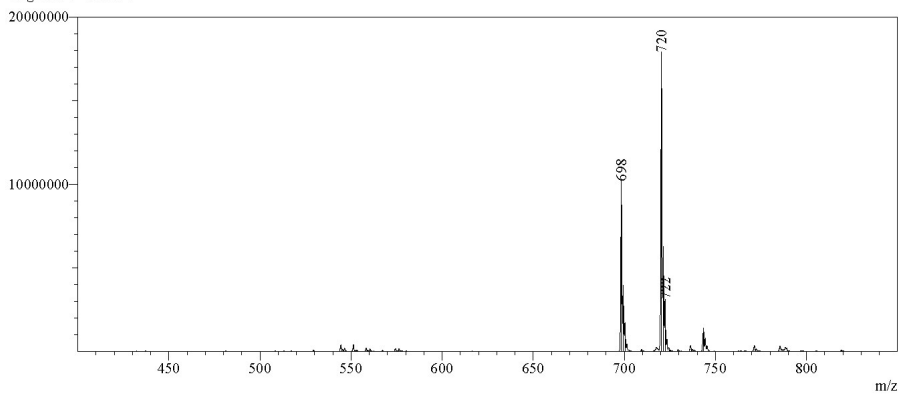

Ac-(cyclo-1,5)-[S<sub>5</sub>AQAC(NTs)]-NH<sub>2</sub> **13A**

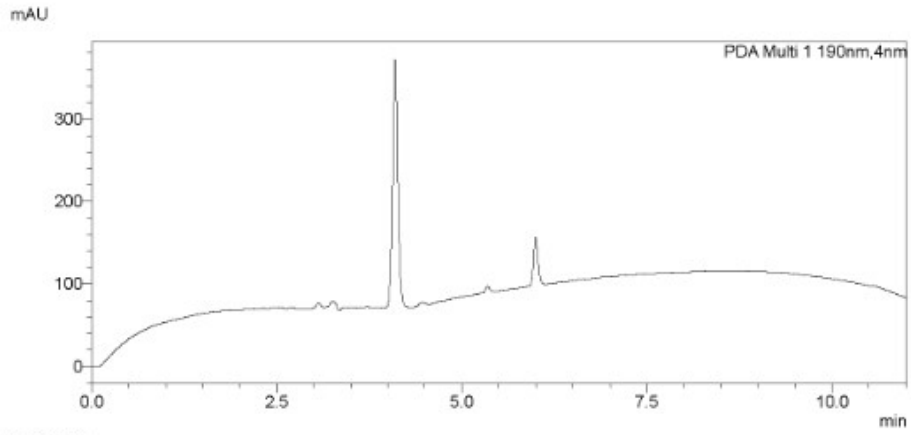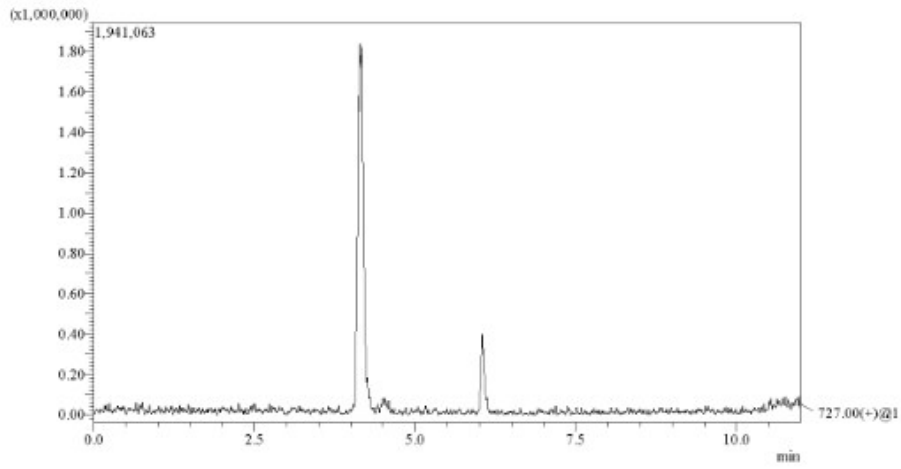

R. Time: 4.099(Scan#:1172)  
MassPeaks:5  
Segment 1 - Event 1

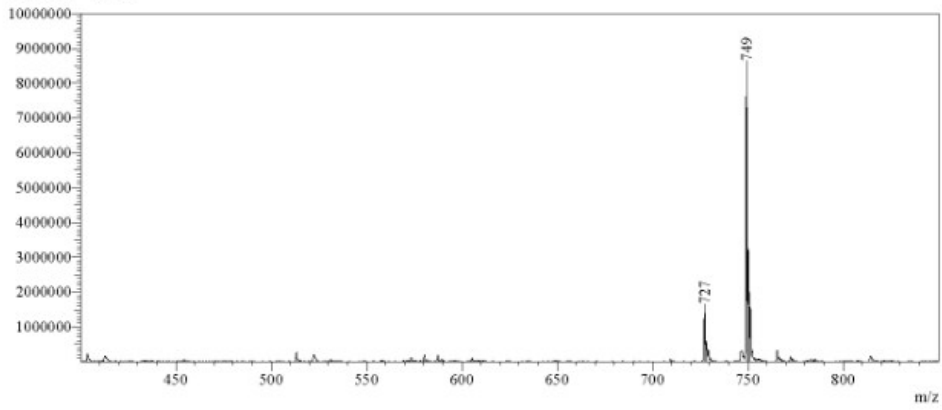

Ac-(cyclo-1,5)-[S<sub>5</sub>AQAC(NTs)]-NH<sub>2</sub> 13B

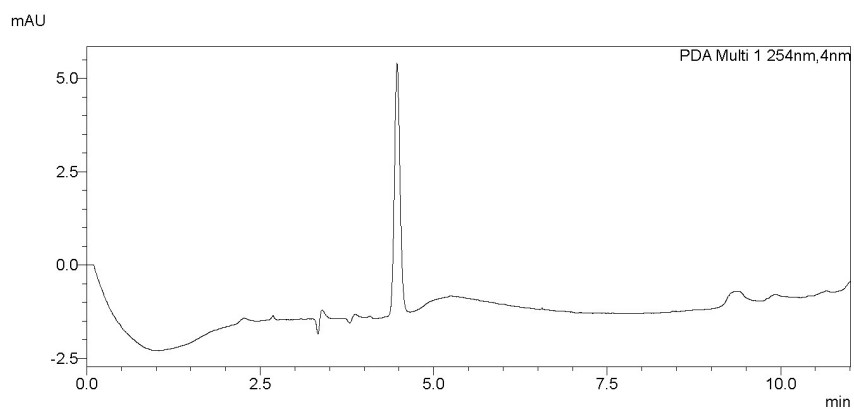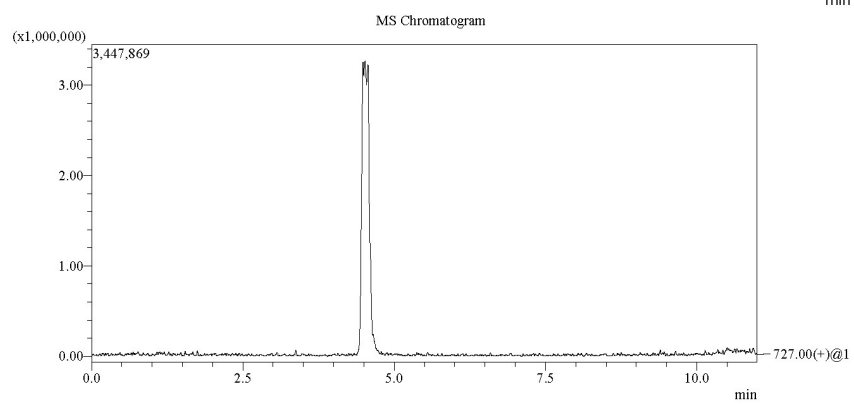

R. Time: 4.498(Scan#: 1286)  
MassPeaks: 8  
Segment 1 - Event 1

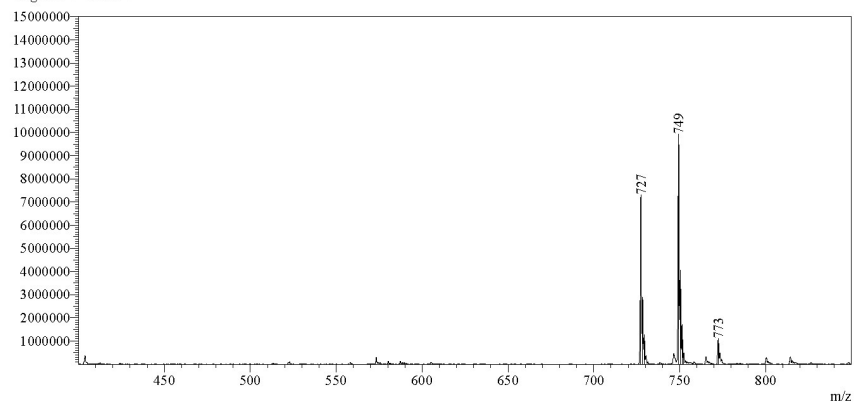

Ac-(cyclo-1,5)-[S<sub>5</sub>ANAC(NTs)]-NH<sub>2</sub> **14A**

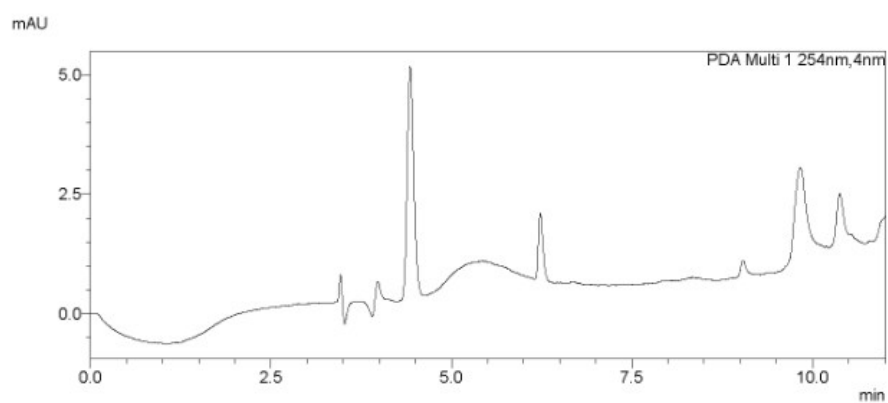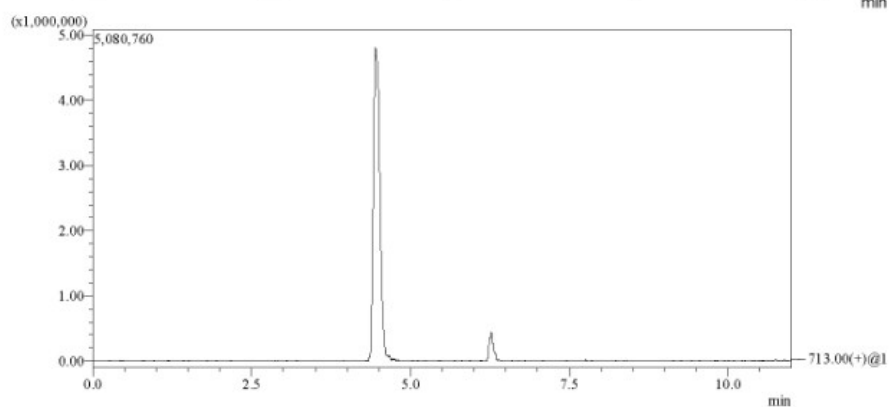

R. Time: 4.498(Scan#:1286)  
MassPeaks:10  
Segment 1 - Event 1

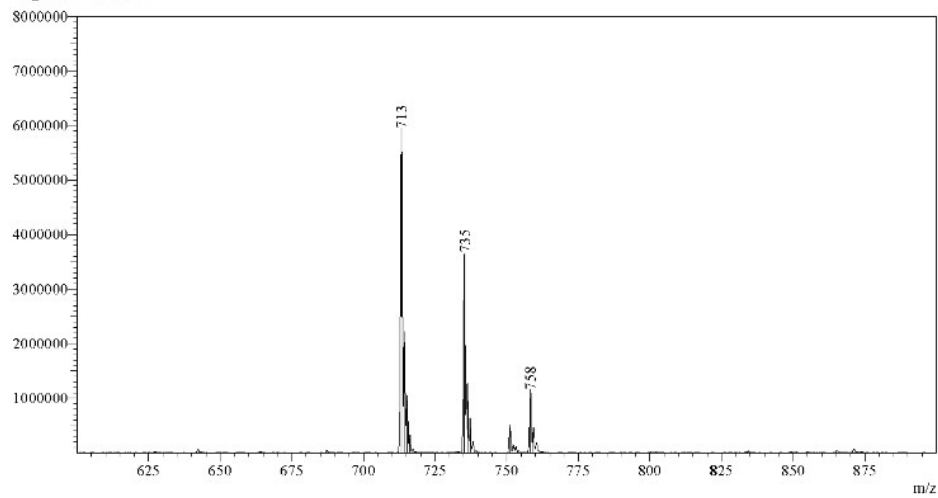

Ac-(cyclo-1,5)-[S<sub>5</sub>ANAC(NTs)]-NH<sub>2</sub> **14B**

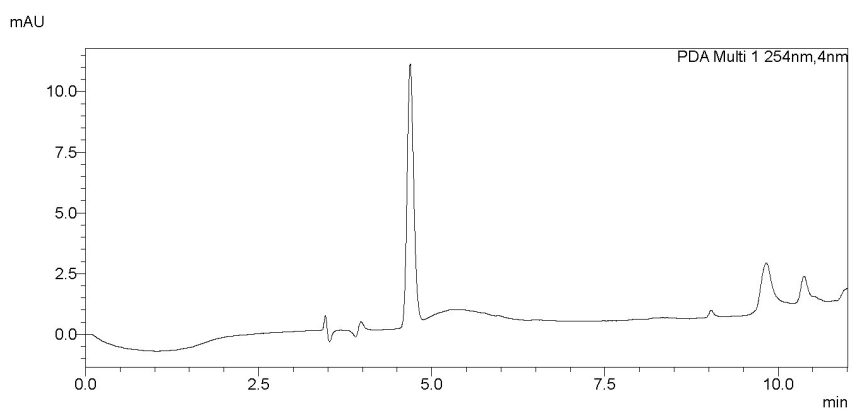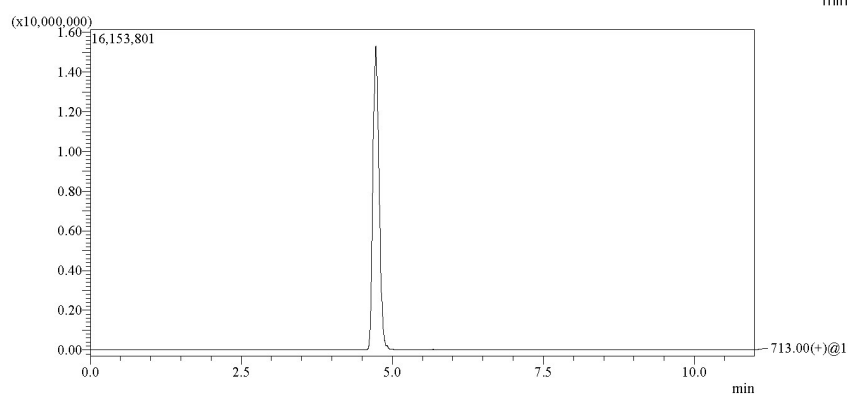

R.Time:4.697(Scan#:1343)  
MassPeaks:9  
Segment 1 - Event 1

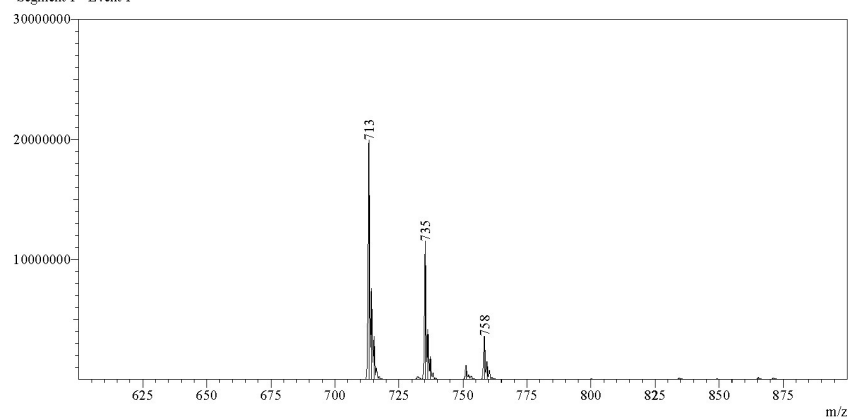

D-Ac-(cyclo-1,5)-[S<sub>5</sub>AIAC(NTs)]-NH<sub>2</sub> 15B

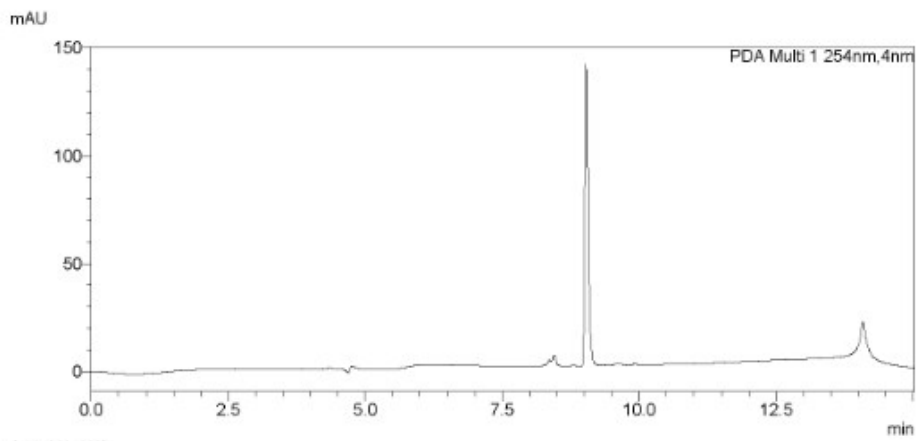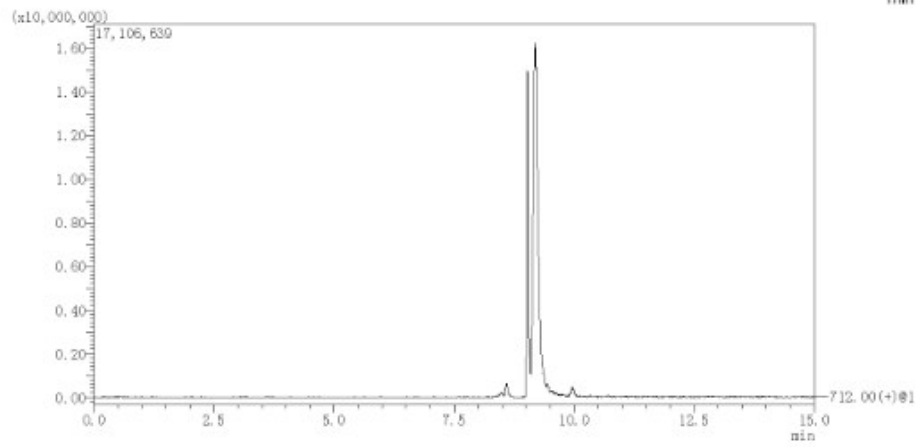

R. Time: 9.198 (Scan#: 2629)  
MassPeaks: 10  
Segment 1 - Event 1

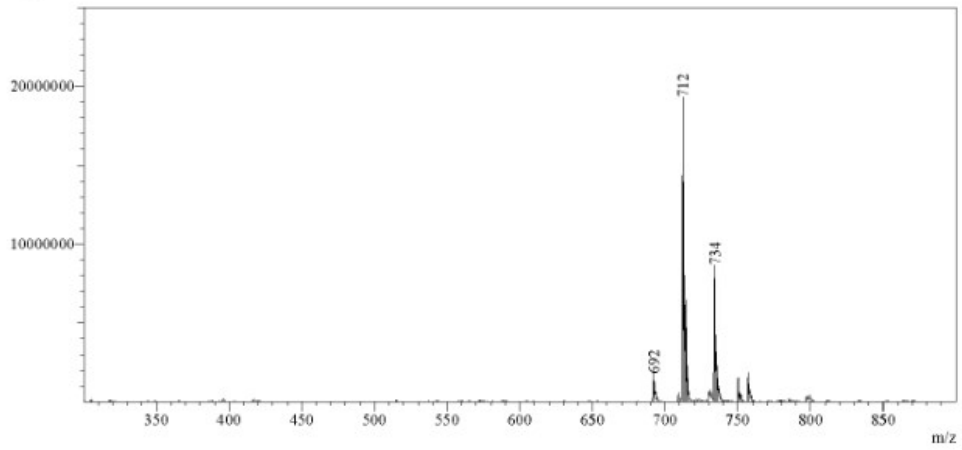

Supplement: c6cc04508a1.pdf [file c6cc04508a1.pdf]
